# Supplementary material for: Positive-sense RNA viruses reveal the complexity and dynamics of the cellular and viral epitranscriptomes during infection
Source: PubMed Central journal article supplement — Nucleic Acids Res. 2018 Jan 24;46(11):5776–91. doi: 10.1093/nar/gky029 (PMC6009648; doi:10.1093/nar/gky029), 2018-01-24
Supplement: gky029_supplemental_files.pdf [file gky029_supplemental_files.pdf]

## SUPPLEMENTARY DATA

Positive-sense RNA viruses reveal the complexity and dynamics of the cellular and viral  
epitranscriptome during infection

Will McIntyre, Rachel Netzband, Gaston Bonenfant, Jason M. Biegel, Clare Miller, Gabriele Fuchs, Eric  
Henderson, Manoj Arra, Mario Canki, Daniele Fabris, and Cara T. Pager

| <b>Oligonucleotide name</b>                                                                                | <b>Sequence (5'–3')</b>     |
|------------------------------------------------------------------------------------------------------------|-----------------------------|
| ZIKV probe 9150-9172                                                                                       | CACCTCCTGAGTTTTCTCTTCC      |
| ZIKV probe 4630-4653                                                                                       | CTCTCCTTTCTTCACTTCTTTGGG    |
| ZIKV probe 2140-2163                                                                                       | TATTGAGTGTCTGATTGCTTGTC     |
| DENV probe 1441-1465                                                                                       | TGTCAATTCTGCTTCTGTGATGGAA   |
| DENV probe 8934-8961                                                                                       | CCTAGCTTCTTCTCTTTTTTCCCATCA |
| DENV probe 9137-9156                                                                                       | GCTCCTCCCTCTTTCTTGCT        |
| HCV probe 339-363                                                                                          | TGAGGTTTAGGATTTGTGCTCATGG   |
| HCV probe 1568-1592                                                                                        | CGTTGGTGTTAATGAGCTGAATGTT   |
| HCV probe 7765-7789                                                                                        | TGTTGTACAGTACACCTTGTTATGG   |
| Polio probe 162-182                                                                                        | GGGTAACAGAAGTGCTTGTTCC      |
| Polio probe 34-57                                                                                          | AGAGTACTGGCCACCACGTGGGCC    |
| Polio probe 450-479                                                                                        | CCTCCGGCCCCTGAATGCGGCTAAT   |
| HIV-1 probe 168-195                                                                                        | CTGTTGCGGCGCCACTGCTAGAGATTT |
| HIV-1 probe 193-214                                                                                        | CCCTTTCGCTTTCAGGTCCCT       |
| HIV-1 probe 412-435                                                                                        | TATGTTTTAATTTATATTTTT       |
| <b>Table S1.</b> Sequences of biotinylated antisense oligonucleotides used in affinity capture procedures. |                             |

| PTM                             | Mock             | ZIKV             | DENV              | HCV               | PV               | PTM                                                                                                    | Mock             | ZIKV              | DENV             | HCV              | PV               |
|---------------------------------|------------------|------------------|-------------------|-------------------|------------------|--------------------------------------------------------------------------------------------------------|------------------|-------------------|------------------|------------------|------------------|
| No. PTMs                        | 47               | 44               | 41                | 40                | 47               | cmo <sup>5</sup> U*                                                                                    | 0.00178 ± 0.0028 | 0.000138 ± 0.0011 |                  |                  | 0.00371 ± 0.0014 |
| Cm                              | 0.0899 ± 0.0124  | 0.0976 ± 0.0003  | 0.146 ± 0.0005    | 0.0833 ± 0.001    | 0.134 ± 0.0009   | chm <sup>5</sup> U                                                                                     | 0.00178 ± 0.0015 | 0.000138 ± 0.0001 |                  |                  | 0.00371 ± 0.003  |
| m <sup>3</sup> C                | 0.0995 ± 0.0137  | 0.108 ± 0.0004   | 0.162 ± 0.0006    | 0.0922 ± 0.0011   | 0.148 ± 0.001    | mcm <sup>5</sup> s <sup>2</sup> U                                                                      |                  |                   |                  |                  | 0.00359 ± 0.0031 |
| m <sup>4</sup> C                | 0.154 ± 0.0213   | 0.167 ± 0.0006   | 0.25 ± 0.0009     | 0.142 ± 0.0017    | 0.228 ± 0.0015   | mcmo <sup>5</sup> U*                                                                                   | 0.0146 ± 0.0118  |                   |                  |                  |                  |
| m <sup>5</sup> C                | 0.145 ± 0.02     | 0.157 ± 0.0006   | 0.235 ± 0.0008    | 0.134 ± 0.0016    | 0.215 ± 0.0014   | mchm <sup>5</sup> U                                                                                    | 0.0146 ± 0.0118  |                   |                  |                  |                  |
| m <sup>4</sup> <sub>4</sub> C*  |                  | 0.012 ± 0.0007   | 0.000149 ± 0.0001 | 0.0706 ± 0.0001   | 0.00206 ± 0.0001 | Am                                                                                                     | 0.304 ± 0.016    | 0.469 ± 0.0006    | 0.528 ± 0.0048   | 0.531 ± 0.0082   | 0.442 ± 0.0027   |
| m <sup>5</sup> Cm*              |                  | 0.0722 ± 0.0047  | 0.000896 ± 0.0001 | 0.423 ± 0.0008    | 0.0124 ± 0.0001  | m <sup>1</sup> A                                                                                       | 0.0176 ± 0.0009  | 0.0271 ± 0.0001   | 0.0305 ± 0.0002  | 0.0307 ± 0.0004  | 0.0255 ± 0.0001  |
| m <sup>4</sup> <sub>4</sub> Cm* |                  |                  | 0.002 ± 0.0001    |                   |                  | m <sup>2</sup> A*                                                                                      | 0.0176 ± 0.0009  | 0.0271 ± 0.0001   | 0.0305 ± 0.0002  | 0.0307 ± 0.0004  | 0.0255 ± 0.0001  |
| f <sup>5</sup> C                |                  |                  |                   |                   | 0.00275 ± 0.0165 | m <sup>6</sup> A                                                                                       | 0.0579 ± 0.003   | 0.0893 ± 0.0001   | 0.101 ± 0.0009   | 0.101 ± 0.0015   | 0.0841 ± 0.0005  |
| hm <sup>5</sup> C               |                  |                  |                   |                   | 0.00421 ± 0.0048 | m <sup>8</sup> A                                                                                       | 0.00674 ± 0.0003 | 0.0104 ± 0.0001   | 0.0117 ± 0.0001  | 0.0118 ± 0.0001  | 0.00979 ± 0.0001 |
| ac <sup>4</sup> C               | 0.692 ± 0.0508   | 0.514 ± 0.0003   | 0.574 ± 0.0101    | 0.351 ± 0.0056    | 0.483 ± 0.0047   | m <sup>1</sup> Am*                                                                                     | 0.00961 ± 0.0044 | 0.00987 ± 0.0003  | 0.0087 ± 0.0003  | 0.112 ± 0.0002   | 0.00547 ± 0.001  |
| ac <sup>4</sup> Cm*             | 0.0137 ± 0.002   | 0.00252 ± 0.0023 | 0.00711 ± 0.0014  |                   | 0.0065 ± 0.0057  | m <sup>6</sup> Am                                                                                      | 0.00961 ± 0.0044 | 0.00987 ± 0.0003  | 0.0087 ± 0.0003  | 0.112 ± 0.0002   | 0.00547 ± 0.001  |
| Y                               | 2.5851 ± 0.0578  | 1.8937 ± 0.0338  | 2.0601 ± 0.073    | 3.215 ± 0.0082    | 1.7535 ± 0.0689  | m <sup>2</sup> <sub>8</sub> A*                                                                         | 0.00874 ± 0.004  | 0.00902 ± 0.0003  | 0.00794 ± 0.0002 | 0.102 ± 0.0002   | 0.00499 ± 0.0009 |
| D                               | 0.333 ± 0.066    | 0.142 ± 0.0013   | 0.291 ± 0.0061    | 0.384 ± 0.0029    | 0.258 ± 0.0013   | m <sup>6</sup> <sub>2</sub> A                                                                          | 0.00874 ± 0.004  | 0.00902 ± 0.0003  | 0.00794 ± 0.0002 | 0.102 ± 0.0002   | 0.00499 ± 0.0009 |
| Um                              | 0.158 ± 0.0023   | 0.0823 ± 0.0007  | 0.102 ± 0.0016    | 0.0699 ± 0.002    | 0.094 ± 0.0014   | m <sup>6</sup> <sub>6</sub> A                                                                          | 0.00874 ± 0.004  | 0.00902 ± 0.0003  | 0.00794 ± 0.0002 | 0.102 ± 0.0002   | 0.00499 ± 0.0009 |
| m <sup>3</sup> U                | 0.0902 ± 0.0013  | 0.0244 ± 0.0002  | 0.0374 ± 0.0006   | 0.0176 ± 0.0005   | 0.0318 ± 0.0004  | i <sup>6</sup> A                                                                                       | 0.000777 ± 0.005 |                   | 0.00378 ± 0.0001 |                  |                  |
| m <sup>5</sup> U                | 0.0902 ± 0.0013  | 0.0244 ± 0.0002  | 0.0374 ± 0.0006   | 0.0176 ± 0.0005   | 0.0318 ± 0.0004  | I                                                                                                      | 0.017 ± 0.0024   | 0.00261 ± 0.0023  | 0.0313 ± 0.0612  | 0.0589 ± 0.0008  | 0.0248 ± 0.0017  |
| Ym                              | 0.245 ± 0.0036   | 0.127 ± 0.001    | 0.158 ± 0.0025    | 0.108 ± 0.0031    | 0.145 ± 0.0022   | m <sup>1</sup> I                                                                                       | 0.00137 ± 0.0508 | 0.163 ± 0.0003    | 0.1 ± 0.0378     |                  | 0.128 ± 0.0109   |
| m <sup>1</sup> Y                | 0.0317 ± 0.0004  | 0.00857 ± 0.0001 | 0.0131 ± 0.0002   | 0.00618 ± 0.0001  | 0.0112 ± 0.0001  | Gm                                                                                                     | 0.0193 ± 0.0009  | 0.0121 ± 0.0002   | 0.0184 ± 0.0009  | 0.0107 ± 0.0007  | 0.0152 ± 0.0003  |
| m <sup>3</sup> Y*               | 0.0317 ± 0.0004  | 0.00857 ± 0.0001 | 0.0131 ± 0.0002   | 0.00618 ± 0.0001  | 0.0112 ± 0.0001  | m <sup>1</sup> G                                                                                       | 0.138 ± 0.0066   | 0.0869 ± 0.0015   | 0.132 ± 0.0068   | 0.0764 ± 0.005   | 0.109 ± 0.0021   |
| m <sup>5</sup> D*               |                  |                  |                   |                   | 0.0183 ± 0.0155  | m <sup>2</sup> G                                                                                       | 0.138 ± 0.0066   | 0.0869 ± 0.0015   | 0.132 ± 0.0068   | 0.0764 ± 0.005   | 0.109 ± 0.0021   |
| m <sup>3</sup> Um*              | 0.00712 ± 0.002  | 0.00336 ± 0.0003 | 0.00517 ± 0.0011  | 0.229 ± 0.0001    | 0.0182 ± 0.0082  | m <sup>7</sup> G                                                                                       | 0.138 ± 0.0066   | 0.0869 ± 0.0015   | 0.132 ± 0.0068   | 0.0764 ± 0.005   | 0.109 ± 0.0021   |
| m <sup>5</sup> Um*              | 0.00712 ± 0.002  | 0.00336 ± 0.0003 | 0.00517 ± 0.0011  | 0.229 ± 0.0001    | 0.0182 ± 0.0082  | m <sup>1</sup> Gm*                                                                                     | 0.00395 ± 0.0002 | 0.00444 ± 0.0001  |                  | 0.00143 ± 0.0001 |                  |
| nm <sup>5</sup> U*              |                  |                  |                   |                   | 0.00419 ± 0.0013 | m <sup>2</sup> Gm*                                                                                     | 0.0208 ± 0.0013  | 0.00444 ± 0.0001  | 0.0291 ± 0.0001  | 0.177 ± 0.0004   | 0.0154 ± 0.0001  |
| mnm <sup>5</sup> U*             |                  |                  |                   | 0.000618 ± 0.0004 |                  | m <sup>2</sup> <sub>2</sub> G                                                                          | 0.0208 ± 0.0013  | 0.0233 ± 0.0005   | 0.00553 ± 0.0001 | 0.0336 ± 0.0001  | 0.00293 ± 0.0001 |
| ho <sup>5</sup> U               | 0.0048 ± 0.0101  | 0.00678 ± 0.0013 |                   |                   | 0.153 ± 0.0155   | m <sup>2</sup> <sub>7</sub> G                                                                          | 0.0208 ± 0.0013  | 0.0233 ± 0.0005   | 0.0291 ± 0.0001  | 0.177 ± 0.0004   | 0.0154 ± 0.0001  |
| ncm <sup>5</sup> U              | 0.0459 ± 0.0093  | 0.00125 ± 0.0023 | 0.0124 ± 0.0001   | 0.00147 ± 0.003   | 0.0326 ± 0.006   | preQ1*                                                                                                 | 0.0208 ± 0.0013  | 0.0233 ± 0.0005   | 0.00553 ± 0.0001 | 0.0336 ± 0.0001  | 0.00293 ± 0.0001 |
| ncm <sup>5</sup> Um*            | 0.00252 ± 0.0057 |                  |                   |                   |                  | m <sup>2</sup> <sub>2</sub> Gm*                                                                        | 0.00551 ± 0.0007 | 0.00826 ± 0.0012  |                  | 0.0301 ± 0.0002  |                  |
| mcm <sup>5</sup> U              | 0.0085 ± 0.0028  |                  |                   |                   |                  | 0  0.5% AvP 1% >5% |                  |                   |                  |                  |                  |

**Table S2.** PTM profiles obtained from total RNA extracts of mock-infected Huh7 cells (control), and Huh7 cells infected with ZIKV, DENV, HCV, and PV, as described in *Materials and Methods*. Full PTM names are listed in **Table S3**. The abundance of each PTM relative to the combined abundances of the canonical ribonucleotides is calculated as described in *Materials and Methods*. Any color change along the gradient carries a  $p < 0.05$  statistical significance. An asterisk (\*) indicates PTMs that to date have not been reported in mammalian systems.

| Symbol                          | PTM Full name                        | Symbol                            | PTM Full name                                 |
|---------------------------------|--------------------------------------|-----------------------------------|-----------------------------------------------|
| C                               | Cytidine                             | cmo <sup>5</sup> U*               | uridine 5-oxyacetic acid                      |
| Cm                              | 2'-O-methylcytidine                  | chm <sup>5</sup> U                | 5-carboxyhydroxymethyluridine                 |
| m <sup>3</sup> C                | 3-methylcytidine                     | mcm <sup>5</sup> s <sup>2</sup> U | 5-methoxycarbonylmethyl-2-thiouridine         |
| m <sup>4</sup> C                | N4-methylcytidine                    | mcmo <sup>5</sup> U*              | uridine 5-oxyacetic acid methyl ester         |
| m <sup>5</sup> C                | 5-methylcytidine                     | mchm <sup>5</sup> U               | 5-(carboxyhydroxymethyl)uridine methyl ester  |
| m <sup>4</sup> <sub>4</sub> C*  | N4,N4-dimethylcytidine               | cmnm <sup>5</sup> Um*             | 5-carboxymethylaminomethyl-2'-O-methyluridine |
| m <sup>5</sup> Cm*              | 5,2'-O-dimethylcytidine              | acp <sup>3</sup> U                | 3-(3-amino-3-carboxypropyl)uridine            |
| m <sup>4</sup> <sub>4</sub> Cm* | N4,N4,2'-O-trimethylcytidine         | acp <sup>3</sup> Um*              | 3-(3-amino-3-carboxypropyl)methyluridine      |
| f <sup>5</sup> C                | 5-formylcytidine                     | A                                 | Adenosine                                     |
| f <sup>5</sup> Cm               | 5-formyl-2'-O-methylcytidine         | Am                                | 2'-O-methyladenosine                          |
| hm <sup>5</sup> C               | 5-hydroxymethylcytidine              | m <sup>1</sup> A                  | 1-methyladenosine                             |
| ac <sup>4</sup> C               | N4-acetylcytidine                    | m <sup>2</sup> A*                 | 2-methyladenosine                             |
| ac <sup>4</sup> Cm*             | N4-acetyl-2'-O-methylcytidine        | m <sup>6</sup> A                  | N6-methyladenosine                            |
| U                               | Uridine                              | m <sup>8</sup> A                  | C8-methyladenosine                            |
| Y                               | Pseudouridine                        | m <sup>1</sup> Am*                | 1,2'-O-dimethyladenosine                      |
| D                               | Dihydrouridine                       | m <sup>6</sup> Am                 | N6,2'-O-dimethyladenosine                     |
| Um                              | 2'-O-methyluridine                   | m <sup>2</sup> <sub>8</sub> A*    | 2,8-dimethyladenosine                         |
| m <sup>3</sup> U                | 3-methyluridine                      | m <sup>6</sup> <sub>2</sub> A     | N6,N6-dimethyladenosine                       |
| m <sup>5</sup> U                | 5-methyluridine                      | m <sup>6</sup> <sub>6</sub> A     | N6,N6-dimethyladenosine                       |
| Ym                              | 2'-O-methylpseudouridine             | m <sup>6</sup> <sub>6</sub> Am*   | N6,N6,2'-O-trimethyladenosine                 |
| m <sup>1</sup> Y                | 1-methylpseudouridine                | hn <sup>6</sup> A*                | N6-hydroxynorvalylcarbamoyladenosine          |
| m <sup>3</sup> Y*               | 3-methylpseudouridine                | i <sup>6</sup> A                  | N6-isopentenyladenosine                       |
| m <sup>5</sup> D*               | 5-methyldihydrouridine               | I                                 | Inosine                                       |
| m <sup>3</sup> Um*              | 3,2'-O-dimethyluridine               | Im                                | 2'-O-methylinosine                            |
| m <sup>5</sup> Um*              | 5,2'-O-dimethyluridine               | m <sup>1</sup> I                  | 1-methylinosine                               |
| s <sup>2</sup> Um               | 2-thio-2'-O-methyluridine            | G                                 | Guanosine                                     |
| m <sup>5</sup> s <sup>2</sup> U | 5-methyl-2-thiouridine               | Gm                                | 2'-O-methylguanosine                          |
| nm <sup>5</sup> U*              | 5-methylaminouridine                 | m <sup>1</sup> G                  | 1-methylguanosine                             |
| mnm <sup>5</sup> U*             | 5-methylaminomethyluridine           | m <sup>2</sup> G                  | N2-methylguanosine                            |
| f <sup>5</sup> U                | 5-formyl-uridine                     | m <sup>7</sup> G                  | 7-methylguanosine                             |
| f <sup>5</sup> Um*              | 5-formyl-O-methyluridine             | m <sup>1</sup> Gm*                | 1,2'-O-dimethylguanosine                      |
| ho <sup>5</sup> U               | 5-hydroxyuridine                     | m <sup>2</sup> Gm*                | N2,2'-O-dimethylguanosine                     |
| ncm <sup>5</sup> U              | 5-carbamoylmethyluridine             | m <sup>2</sup> <sub>2</sub> G     | N2,N2-dimethylguanosine                       |
| ncm <sup>5</sup> Um*            | 5-carbamoylmethyl-2'-O-methyluridine | m <sup>2</sup> <sub>7</sub> G     | N2,7-dimethylguanosine                        |
| mcm <sup>5</sup> U              | 5-methoxycarbonylmethyluridine       | PreQ1*                            | 7-aminomethyl-7-deazaguanosine                |
| mo <sup>5</sup> U               | 5-methoxyuridine                     | m <sup>2</sup> <sub>2</sub> Gm*   | N2,N2,2'-O-trimethylguansine                  |

**Table S3.** Symbol and name of PTMs identified in this study. An asterisk (\*) indicates PTMs that to date have not been reported in mammalian systems.

| PTM                           | Mock            | HIV-1           | PTM                           | Mock            | HIV-1           |
|-------------------------------|-----------------|-----------------|-------------------------------|-----------------|-----------------|
| No. PTMs                      | <b>37</b>       | <b>38</b>       | m <sup>6</sup> A              | 0.038 ± 0.002   | 0.0597 ± 0.0041 |
| Cm                            | 0.0841 ± 0.0171 | 0.0981 ± 0.0159 | m <sup>8</sup> A              | 0.0044 ± 0.0109 | 0.0070 ± 0.0218 |
| m <sup>3</sup> C              | 0.093 ± 0.0189  | 0.109 ± 0.0177  | ac <sup>4</sup> C             | 0.66 ± 0.0331   | 0.701 ± 0.0144  |
| m <sup>5</sup> C              | 0.135 ± 0.0274  | 0.158 ± 0.0256  | f <sup>5</sup> Cm             |                 | 0.0013 ± 0.0144 |
| m <sup>4</sup> C              | 0.144 ± 0.0293  | 0.168 ± 0.0272  | m <sup>6</sup> Am             | 0.0040 ± 0.0152 | 0.0029 ± 0.013  |
| Y                             | 1.6964 ± 0.0413 | 2.0087 ± 0.0338 | m <sup>1</sup> Am             | 0.0040 ± 0.0152 | 0.0029 ± 0.013  |
| D                             | 0.334 ± 0.0971  | 0.36 ± 0.0374   | m <sup>6</sup> <sub>2</sub> A | 0.0037 ± 0.0139 | 0.0027 ± 0.0118 |
| Um                            | 0.148 ± 0.0258  | 0.118 ± 0.0123  | m <sup>6</sup> <sub>6</sub> A | 0.0037 ± 0.0139 | 0.0027 ± 0.0118 |
| Ym                            | 0.23 ± 0.0401   | 0.183 ± 0.0191  | m <sup>2</sup> <sub>8</sub> A | 0.0037 ± 0.0139 | 0.0027 ± 0.0118 |
| m <sup>5</sup> U              | 0.0793 ± 0.0138 | 0.0502 ± 0.0052 | m <sup>7</sup> G              | 0.0798 ± 0.023  | 0.096 ± 0.0205  |
| m <sup>1</sup> Y              | 0.0279 ± 0.0048 | 0.0176 ± 0.0018 | m <sup>1</sup> G              | 0.0798 ± 0.023  | 0.096 ± 0.0205  |
| m <sup>3</sup> U              | 0.0793 ± 0.0138 | 0.0502 ± 0.0052 | m <sup>2</sup> G              | 0.0798 ± 0.023  | 0.096 ± 0.0205  |
| m <sup>3</sup> Y              | 0.0279 ± 0.0048 | 0.0176 ± 0.0018 | Gm                            | 0.0111 ± 0.0031 | 0.0134 ± 0.0028 |
| I                             | 0.0111 ± 0.0015 | 0.0105 ± 0.0013 | ac <sup>4</sup> Cm            | 0.0048 ± 0.0014 | 0.0060 ± 0.0017 |
| m <sup>5</sup> Cm             |                 | 0.0011 ± 0.0003 | ncm <sup>5</sup> U            | 0.0302 ± 0.0027 | 0.0247 ± 0.0024 |
| m <sup>4</sup> <sub>4</sub> C |                 | 0.0007 ± 0.0002 | m <sup>1</sup> Gm             | 0.0028 ± 0.0003 | 0.0027 ± 0.0004 |
| m <sup>5</sup> Um             | 0.0139 ± 0.0488 | 0.0088 ± 0.0032 | m <sup>2</sup> <sub>2</sub> G | 0.0148 ± 0.0017 | 0.0144 ± 0.0022 |
| m <sup>3</sup> Um             | 0.0139 ± 0.0488 | 0.0088 ± 0.0032 | m <sup>2</sup> Gm             | 0.0028 ± 0.0003 | 0.0027 ± 0.0004 |
| Am                            | 0.2 ± 0.0109    | 0.314 ± 0.0218  | preQ1                         | 0.0148 ± 0.0017 | 0.0144 ± 0.0022 |
| m <sup>1</sup> A              | 0.0114 ± 0.0006 | 0.018 ± 0.0012  | m <sup>2</sup> <sub>7</sub> G | 0.0148 ± 0.0017 | 0.0144 ± 0.0022 |
| m <sup>2</sup> A              | 0.0114 ± 0.0006 | 0.018 ± 0.0012  |                               |                 |                 |

**Table S4.** PTM profiles obtained from total RNA extracts from mock- and HIV-infected 293T cells, as described in *Materials and Methods*. Full PTM names are listed in **Table S3**. The abundance of each PTM relative to the combined abundances of the canonical ribonucleotides is calculated as described in *Materials and Methods*. Any color change along the gradient carries a  $p < 0.05$  statistical significance.

|                               | Huh7            |                 | HeLa             |                  |                                                                                                        | Huh7             |                 | HeLa            |                  |
|-------------------------------|-----------------|-----------------|------------------|------------------|--------------------------------------------------------------------------------------------------------|------------------|-----------------|-----------------|------------------|
| PTM                           | Mock            | ZIKV            | Mock             | ZIKV             | PTM                                                                                                    | Mock             | ZIKV            | Mock            | ZIKV             |
| No. PTMs                      | 47              | 44              | 31               | 34               | cmnm <sup>5</sup> Um                                                                                   |                  |                 |                 | 0.013 ± 0.0001   |
| Cm                            | 0.0899 ± 0.0124 | 0.0976 ± 0.0003 | 0.271 ± 0.0004   | 0.369 ± 0.0816   | acp <sup>3</sup> U                                                                                     |                  |                 |                 | 0.0361 ± 0.0127  |
| m <sup>3</sup> C              | 0.0995 ± 0.0137 | 0.108 ± 0.0004  | 0.3 ± 0.0005     | 0.142 ± 0.0314   | acp <sup>3</sup> Um                                                                                    |                  |                 |                 | 0.0014 ± 0.0046  |
| m <sup>4</sup> C              | 0.154 ± 0.0213  | 0.167 ± 0.0006  | 0.463 ± 0.0008   | 0.142 ± 0.0314   | Am                                                                                                     | 0.304 ± 0.016    | 0.469 ± 0.0006  | 0.344 ± 0.0012  | 0.207 ± 0.0248   |
| m <sup>5</sup> C              | 0.145 ± 0.02    | 0.157 ± 0.0006  | 0.436 ± 0.0007   | 0.12 ± 0.0265    | m <sup>1</sup> A                                                                                       | 0.0176 ± 0.0009  | 0.0271 ± 0.0001 | 0.0197 ± 0.0001 | 0.121 ± 0.0144   |
| m <sup>4</sup> <sub>4</sub> C |                 | 0.012 ± 0.0007  |                  | 0.0185 ± 0.0001  | m <sup>2</sup> A                                                                                       | 0.0176 ± 0.0009  | 0.0271 ± 0.0001 | 0.0197 ± 0.0001 | 0.121 ± 0.0144   |
| m <sup>5</sup> Cm             |                 | 0.0722 ± 0.0047 |                  | 0.00167 ± 0.0001 | m <sup>6</sup> A                                                                                       | 0.0579 ± 0.003   | 0.0893 ± 0.0001 | 0.0655 ± 0.0002 | 0.127 ± 0.0152   |
| f <sup>5</sup> Cm             |                 |                 |                  | 0.0468 ± 0.0627  | m <sup>8</sup> A                                                                                       | 0.0067 ± 0.0003  | 0.0104 ± 0.0001 | 0.0076 ± 0.0001 | 0.115 ± 0.0137   |
| ac <sup>4</sup> C             | 0.692 ± 0.0508  | 0.514 ± 0.0003  | 0.475 ± 0.0039   | 0.494 ± 0.0627   | m <sup>1</sup> Am                                                                                      | 0.0096 ± 0.0044  | 0.0099 ± 0.0003 |                 |                  |
| ac <sup>4</sup> Cm            | 0.0137 ± 0.002  | 0.0025 ± 0.0023 | 0.0132 ± 0.0005  |                  | m <sup>6</sup> Am                                                                                      | 0.0096 ± 0.0044  | 0.0099 ± 0.0003 |                 |                  |
| Y                             | 2.5851 ± 0.0578 | 1.8937 ± 0.0338 | 1.7009 ± 0.0104  | 2.7786 ± 0.3695  | m <sup>2</sup> <sub>8</sub> A                                                                          | 0.0087 ± 0.004   | 0.0090 ± 0.0003 |                 |                  |
| D                             | 0.333 ± 0.066   | 0.142 ± 0.0013  | 1.32 ± 0.0017    | 0.36 ± 0.1575    | m <sup>6</sup> <sub>2</sub> A                                                                          | 0.0087 ± 0.004   | 0.0090 ± 0.0003 |                 |                  |
| Um                            | 0.158 ± 0.0023  | 0.0823 ± 0.0007 | 0.241 ± 0.0003   | 0.139 ± 0.0204   | m <sup>6</sup> <sub>6</sub> A                                                                          | 0.0087 ± 0.004   | 0.0090 ± 0.0003 |                 |                  |
| m <sup>3</sup> U              | 0.0902 ± 0.0013 | 0.0244 ± 0.0002 | 0.209 ± 0.0002   | 0.185 ± 0.0271   | hn <sup>6</sup> A                                                                                      |                  |                 |                 | 0.0132 ± 0.0001  |
| m <sup>5</sup> U              | 0.0902 ± 0.0013 | 0.0244 ± 0.0002 | 0.209 ± 0.0002   | 0.0307 ± 0.0045  | i <sup>6</sup> A                                                                                       | 0.000777 ± 0.005 |                 |                 |                  |
| Ym                            | 0.245 ± 0.0036  | 0.127 ± 0.001   | 0.373 ± 0.0004   | 0.0029 ± 0.0004  | l                                                                                                      | 0.017 ± 0.0024   | 0.0026 ± 0.0023 | 0.0685 ± 0.0002 |                  |
| m <sup>1</sup> Y              | 0.0317 ± 0.0004 | 0.0086 ± 0.0001 | 0.0734 ± 0.0001  | 0.181 ± 0.0265   | m <sup>1</sup> l                                                                                       | 0.00137 ± 0.0508 | 0.163 ± 0.0003  |                 |                  |
| m <sup>3</sup> Y              | 0.0317 ± 0.0004 | 0.0086 ± 0.0001 | 0.0734 ± 0.0001  | 0.181 ± 0.0265   | Gm                                                                                                     | 0.0193 ± 0.0009  | 0.0121 ± 0.0002 | 0.0228 ± 0.0002 | 0.0618 ± 0.0105  |
| m <sup>3</sup> Um             | 0.0071 ± 0.002  | 0.0034 ± 0.0003 | 0.0419 ± 0.0002  |                  | m <sup>1</sup> G                                                                                       | 0.138 ± 0.0066   | 0.0869 ± 0.0015 | 0.164 ± 0.0018  | 0.129 ± 0.0219   |
| m <sup>5</sup> Um             | 0.0071 ± 0.002  | 0.0034 ± 0.0003 | 0.0419 ± 0.0002  |                  | m <sup>2</sup> G                                                                                       | 0.138 ± 0.0066   | 0.0869 ± 0.0015 | 0.164 ± 0.0018  | 0.617 ± 0.1049   |
| ho <sup>5</sup> U             | 0.0048 ± 0.0101 | 0.0068 ± 0.0013 |                  |                  | m <sup>7</sup> G                                                                                       | 0.138 ± 0.0066   | 0.0869 ± 0.0015 | 0.164 ± 0.0018  | 0.0614 ± 0.0104  |
| ncm <sup>5</sup> U            | 0.0459 ± 0.0093 | 0.0013 ± 0.0023 | 0.00669 ± 0.0005 | 0.00279 ± 0.0431 | m <sup>1</sup> Gm                                                                                      | 0.00395 ± 0.0002 | 0.0044 ± 0.0001 | 0.0352 ± 0.0003 | 0.0314 ± 0.0236  |
| ncm <sup>5</sup> Um           | 0.0025 ± 0.0057 |                 |                  |                  | m <sup>2</sup> Gm                                                                                      | 0.0208 ± 0.0013  | 0.0044 ± 0.0001 | 0.0352 ± 0.0003 | 0.00646 ± 0.0048 |
| mcm <sup>5</sup> U            | 0.0085 ± 0.0028 |                 |                  |                  | m <sup>2</sup> <sub>2</sub> G                                                                          | 0.0208 ± 0.0013  | 0.0233 ± 0.0005 | 0.0067 ± 0.0001 | 0.0028 ± 0.002   |
| cmo <sup>5</sup> U            | 0.0018 ± 0.0028 | 0.0001 ± 0.0011 |                  |                  | m <sup>2</sup> <sub>7</sub> G                                                                          | 0.0208 ± 0.0013  | 0.0233 ± 0.0005 |                 |                  |
| chm <sup>5</sup> U            | 0.0018 ± 0.0015 | 0.0001 ± 0.0001 |                  |                  | preQ1                                                                                                  | 0.0208 ± 0.0013  | 0.0233 ± 0.0005 | 0.0352 ± 0.0003 | 0.0065 ± 0.0048  |
| mcmo <sup>5</sup> U           | 0.0146 ± 0.0118 |                 |                  |                  | m <sup>2</sup> <sub>2</sub> Gm                                                                         | 0.00551 ± 0.0007 | 0.0083 ± 0.0012 |                 |                  |
| mchm <sup>5</sup> U           | 0.0146 ± 0.0118 |                 |                  |                  | 0  0.5% AvP 1% >5% |                  |                 |                 |                  |

**Table S5.** PTM profiles obtained from total RNA extracts from mock- and ZIKV-infected Huh7 and HeLa cells, as described in *Materials and Methods*. Full PTM names are listed in **Table S3**. The abundance of each PTM relative to the combined abundances of the canonical ribonucleotides is calculated as described in *Materials and Method*. Any color change along the gradient carries a p < 0.05 statistical significance.

|                               | Huh7            |                 | HeLa            |                 | 293T            |                 |                                   | Huh7            |                 | HeLa            |                 | 293T            |                 |
|-------------------------------|-----------------|-----------------|-----------------|-----------------|-----------------|-----------------|-----------------------------------|-----------------|-----------------|-----------------|-----------------|-----------------|-----------------|
| PTM                           | Mock            | PV              | Mock            | PV              | Mock            | PV              | PTM                               | Mock            | PV              | Mock            | PV              | Mock            | PV              |
| No. PTMs                      | 47              | 47              | 31              | 38              | 37              | 40              | mcm <sup>5</sup> S <sup>2</sup> U |                 | 0.0036 ± 0.0031 |                 |                 |                 |                 |
| Cm                            | 0.0899 ± 0.0124 | 0.134 ± 0.0009  | 0.271 ± 0.0004  | 0.125 ± 0.0057  | 0.0841 ± 0.0171 | 0.111 ± 0.0093  | mcmo <sup>5</sup> U               | 0.0146 ± 0.0118 |                 |                 |                 |                 |                 |
| m <sup>3</sup> C              | 0.0995 ± 0.0137 | 0.148 ± 0.001   | 0.3 ± 0.0005    | 0.138 ± 0.0063  | 0.093 ± 0.0189  | 0.133 ± 0.0111  | mchm <sup>5</sup> U               | 0.0146 ± 0.0118 |                 |                 |                 |                 |                 |
| m <sup>4</sup> C              | 0.154 ± 0.0213  | 0.228 ± 0.0015  | 0.463 ± 0.0008  | 0.214 ± 0.0097  | 0.144 ± 0.0293  | 0.133 ± 0.0111  | cmnm <sup>5</sup> Um              |                 |                 |                 |                 |                 | 0.01 ± 0.004    |
| m <sup>5</sup> C              | 0.145 ± 0.02    | 0.215 ± 0.0014  | 0.436 ± 0.0007  | 0.201 ± 0.0092  | 0.135 ± 0.0274  | 0.344 ± 0.0289  | acp <sup>3</sup> U                |                 |                 |                 |                 |                 | 0.0379 ± 0.004  |
| m <sup>4</sup> <sub>4</sub> C |                 | 0.0021 ± 0.0001 |                 | 0.0045 ± 0.0001 |                 | 0.0003 ± 0.0001 | Am                                | 0.304 ± 0.016   | 0.442 ± 0.0027  | 0.344 ± 0.0012  | 0.407 ± 0.0302  | 0.2 ± 0.0109    | 0.242 ± 0.0116  |
| m <sup>5</sup> Cm             |                 | 0.0124 ± 0.0001 |                 | 0.027 ± 0.0011  |                 | 0.0021 ± 0.0001 | m <sup>1</sup> A                  | 0.0176 ± 0.0009 | 0.0255 ± 0.0001 | 0.0197 ± 0.0001 | 0.0233 ± 0.0017 | 0.0114 ± 0.0006 | 0.075 ± 0.0035  |
| f <sup>5</sup> C              |                 | 0.0028 ± 0.0165 |                 |                 |                 |                 | m <sup>2</sup> A                  | 0.0176 ± 0.0009 | 0.0255 ± 0.0001 | 0.0197 ± 0.0001 | 0.0233 ± 0.0017 | 0.0114 ± 0.0006 | 0.075 ± 0.0035  |
| hm <sup>5</sup> C             |                 | 0.0042 ± 0.0048 |                 |                 |                 |                 | m <sup>6</sup> A                  | 0.0579 ± 0.003  | 0.0841 ± 0.0005 | 0.0655 ± 0.0002 | 0.0775 ± 0.0057 | 0.038 ± 0.002   | 0.0889 ± 0.0042 |
| ac <sup>4</sup> C             | 0.692 ± 0.0508  | 0.483 ± 0.0047  | 0.475 ± 0.0039  |                 | 0.66 ± 0.0331   | 0.452 ± 0.0085  | m <sup>8</sup> A                  | 0.0067 ± 0.0003 | 0.0098 ± 0.0001 | 0.0076 ± 0.0001 | 0.0090 ± 0.0006 | 0.0044 ± 0.0109 | 0.0612 ± 0.0029 |
| ac <sup>4</sup> Cm            | 0.0137 ± 0.002  | 0.0065 ± 0.0057 | 0.0132 ± 0.0005 | 0.0117 ± 0.0008 | 0.0048 ± 0.0014 |                 | m <sup>1</sup> Am                 | 0.0096 ± 0.0044 | 0.0055 ± 0.001  |                 | 0.0088 ± 0.0001 | 0.0040 ± 0.0152 | 0.0022 ± 0.0006 |
| Y                             | 2.5851 ± 0.0578 | 1.7535 ± 0.0689 | 1.7009 ± 0.0104 | 2.0926 ± 0.0053 | 1.6964 ± 0.0413 | 1.931 ± 0.0442  | m <sup>6</sup> Am                 | 0.0096 ± 0.0044 | 0.0055 ± 0.001  |                 | 0.0088 ± 0.0001 | 0.0040 ± 0.0152 | 0.0022 ± 0.0006 |
| D                             | 0.333 ± 0.066   | 0.258 ± 0.0013  | 1.32 ± 0.0017   | 0.298 ± 0.0013  | 0.334 ± 0.0971  | 0.429 ± 0.0971  | m <sup>2</sup> <sub>8</sub> A     | 0.0087 ± 0.004  | 0.0050 ± 0.0009 |                 | 0.008 ± 0.0001  | 0.0037 ± 0.0139 |                 |
| Um                            | 0.158 ± 0.0023  | 0.094 ± 0.0014  | 0.241 ± 0.0003  | 0.0926 ± 0.0072 | 0.148 ± 0.0258  | 0.121 ± 0.0085  | m <sup>6</sup> <sub>2</sub> A     | 0.0087 ± 0.004  | 0.0050 ± 0.0009 |                 | 0.008 ± 0.0001  | 0.0037 ± 0.0139 | 0.0146 ± 0.004  |
| m <sup>3</sup> U              | 0.0902 ± 0.0013 | 0.0318 ± 0.0004 | 0.209 ± 0.0002  | 0.0308 ± 0.0024 | 0.0793 ± 0.0138 | 0.0597 ± 0.0042 | m <sup>6</sup> <sub>6</sub> A     | 0.0087 ± 0.004  | 0.0050 ± 0.0009 |                 | 0.008 ± 0.0001  | 0.0037 ± 0.0139 |                 |
| m <sup>5</sup> U              | 0.0902 ± 0.0013 | 0.0318 ± 0.0004 | 0.209 ± 0.0002  | 0.0308 ± 0.0024 | 0.0793 ± 0.0138 | 0.0597 ± 0.0042 | hn <sup>6</sup> A                 |                 |                 |                 |                 |                 | 0.0082 ± 0.0001 |
| Ym                            | 0.245 ± 0.0036  | 0.145 ± 0.0022  | 0.373 ± 0.0004  | 0.143 ± 0.0111  | 0.23 ± 0.0401   | 0.121 ± 0.0085  | i <sup>6</sup> A                  | 0.0008 ± 0.0005 |                 |                 |                 |                 |                 |
| m <sup>1</sup> Y              | 0.0317 ± 0.0004 | 0.0112 ± 0.0001 | 0.0734 ± 0.0001 | 0.0108 ± 0.0008 | 0.0279 ± 0.0048 | 0.0565 ± 0.0039 | l                                 | 0.017 ± 0.0024  | 0.0248 ± 0.0017 | 0.0685 ± 0.0002 | 0.0349 ± 0.0004 | 0.0111 ± 0.0015 | 0.0346 ± 0.0068 |
| m <sup>3</sup> Y              | 0.0317 ± 0.0004 | 0.0112 ± 0.0001 | 0.0734 ± 0.0001 | 0.0108 ± 0.0008 | 0.0279 ± 0.0048 | 0.0565 ± 0.0039 | lm                                |                 |                 |                 |                 |                 | 0.0273 ± 0.0001 |
| m <sup>5</sup> D              |                 | 0.0183 ± 0.0155 |                 |                 |                 |                 | m <sup>1</sup> l                  | 0.0014 ± 0.0508 | 0.128 ± 0.0109  |                 |                 |                 | 0.0205 ± 0.0001 |
| m <sup>3</sup> Um             | 0.0071 ± 0.002  | 0.0182 ± 0.0082 | 0.0419 ± 0.0002 |                 | 0.0139 ± 0.0488 |                 | Gm                                | 0.0193 ± 0.0009 | 0.0152 ± 0.0003 | 0.0228 ± 0.0002 | 0.0156 ± 0.0023 | 0.0111 ± 0.0031 | 0.29 ± 0.0272   |
| m <sup>5</sup> Um             | 0.0071 ± 0.002  | 0.0182 ± 0.0082 | 0.0419 ± 0.0002 |                 | 0.0139 ± 0.0488 |                 | m <sup>1</sup> G                  | 0.138 ± 0.0066  | 0.109 ± 0.0021  | 0.164 ± 0.0018  | 0.112 ± 0.017   | 0.0798 ± 0.023  | 0.211 ± 0.0198  |
| nm <sup>5</sup> U             |                 | 0.0042 ± 0.0013 |                 |                 |                 |                 | m <sup>2</sup> G                  | 0.138 ± 0.0066  | 0.109 ± 0.0021  | 0.164 ± 0.0018  | 0.112 ± 0.017   | 0.0798 ± 0.023  | 0.33 ± 0.031    |
| f <sup>5</sup> U              |                 |                 |                 | 0.0034 ± 0.0001 |                 | 0.0263 ± 0.0001 | m <sup>7</sup> G                  | 0.138 ± 0.0066  | 0.109 ± 0.0021  | 0.164 ± 0.0018  | 0.112 ± 0.017   | 0.0798 ± 0.023  | 0.0022 ± 0.0002 |
| ho <sup>5</sup> U             | 0.0048 ± 0.0101 | 0.153 ± 0.0155  |                 | 0.269 ± 0.0106  |                 |                 | m <sup>1</sup> Gm                 | 0.0040 ± 0.0002 |                 | 0.0352 ± 0.0003 | 0.0341 ± 0.0008 | 0.0028 ± 0.0003 | 0.0070 ± 0.0022 |
| ncm <sup>5</sup> U            | 0.0459 ± 0.0093 | 0.0326 ± 0.006  | 0.0067 ± 0.0005 | 0.0065 ± 0.0013 | 0.0302 ± 0.0027 | 0.0166 ± 0.0044 | m <sup>2</sup> Gm                 | 0.0208 ± 0.0013 | 0.0154 ± 0.0001 | 0.0352 ± 0.0003 | 0.0341 ± 0.0008 | 0.0028 ± 0.0003 | 0.0070 ± 0.0022 |
| ncm <sup>5</sup> Um           | 0.0025 ± 0.0057 |                 |                 |                 |                 |                 | m <sup>2</sup> <sub>2</sub> G     | 0.0208 ± 0.0013 | 0.0029 ± 0.0001 | 0.0067 ± 0.0001 | 0.0065 ± 0.0001 | 0.0148 ± 0.0017 | 0.0122 ± 0.0038 |
| mcm <sup>5</sup> U            | 0.0085 ± 0.0028 |                 |                 |                 |                 |                 | m <sup>2</sup> <sub>7</sub> G     | 0.0208 ± 0.0013 | 0.0154 ± 0.0001 |                 | 0.0089 ± 0.0002 | 0.0148 ± 0.0017 | 0.0631 ± 0.0199 |
| cmo <sup>5</sup> U            | 0.0018 ± 0.0028 | 0.0037 ± 0.0014 |                 |                 |                 |                 | preQ1                             | 0.0208 ± 0.0013 | 0.0029 ± 0.0001 | 0.0352 ± 0.0003 | 0.0341 ± 0.0008 | 0.0148 ± 0.0017 | 0.0044 ± 0.0013 |
| chm <sup>5</sup> U            | 0.0018 ± 0.0015 | 0.0037 ± 0.003  |                 |                 |                 |                 | m <sup>2</sup> <sub>2</sub> Gm    | 0.0055 ± 0.0007 |                 |                 |                 |                 |                 |

0  0.5% AvP  1% >5%

**Table S6.** PTM profiles obtained from total RNA extracts of mock-infected Huh7, HeLa, and 293T cells, as described in *Materials and Methods*. Full PTM names are listed in **Table S3**. The abundance of each PTM relative to the combined abundances of the canonical ribonucleotides is calculated as described in *Materials and Method*. Any color change along the gradient carries a  $p < 0.05$  statistical significance.

| PTM                 | Huh7            | HeLa            | 293T             | PTM                            | Huh7            | HeLa            | 293T            |
|---------------------|-----------------|-----------------|------------------|--------------------------------|-----------------|-----------------|-----------------|
| No. PTMs            | 47              | 31              | 37               | mchm <sup>5</sup> U            | 0.0146 ± 0.0118 |                 |                 |
| Cm                  | 0.0899 ± 0.0124 | 0.271 ± 0.0004  | 0.0841 ± 0.0171  | Am                             | 0.304 ± 0.016   | 0.344 ± 0.0012  | 0.2 ± 0.0109    |
| m <sup>3</sup> C    | 0.0995 ± 0.0137 | 0.3 ± 0.0005    | 0.093 ± 0.0189   | m <sup>1</sup> A               | 0.0176 ± 0.0009 | 0.0197 ± 0.0001 | 0.0114 ± 0.0006 |
| m <sup>4</sup> C    | 0.154 ± 0.0213  | 0.463 ± 0.0008  | 0.144 ± 0.0293   | m <sup>2</sup> A               | 0.0176 ± 0.0009 | 0.0197 ± 0.0001 | 0.0114 ± 0.0006 |
| m <sup>5</sup> C    | 0.145 ± 0.02    | 0.436 ± 0.0007  | 0.135 ± 0.0274   | m <sup>6</sup> A               | 0.0579 ± 0.003  | 0.0655 ± 0.0002 | 0.038 ± 0.002   |
| ac <sup>4</sup> C   | 0.692 ± 0.0508  | 0.475 ± 0.0039  | 0.66 ± 0.0331    | m <sup>8</sup> A               | 0.0067 ± 0.0003 | 0.0076 ± 0.0001 | 0.0044 ± 0.0109 |
| ac <sup>4</sup> Cm  | 0.0137 ± 0.002  | 0.0132 ± 0.0005 | 0.00475 ± 0.0014 | m <sup>1</sup> Am              | 0.0096 ± 0.0044 |                 | 0.0040 ± 0.0152 |
| Y                   | 2.5851 ± 0.0578 | 1.7009 ± 0.0104 | 1.6964 ± 0.0413  | m <sup>6</sup> Am              | 0.0096 ± 0.0044 |                 | 0.0040 ± 0.0152 |
| D                   | 0.333 ± 0.066   | 1.32 ± 0.0017   | 0.334 ± 0.0971   | m <sup>2</sup> <sub>8</sub> A  | 0.0087 ± 0.004  |                 | 0.0037 ± 0.0139 |
| Um                  | 0.158 ± 0.0023  | 0.241 ± 0.0003  | 0.148 ± 0.0258   | m <sup>6</sup> <sub>2</sub> A  | 0.0087 ± 0.004  |                 | 0.0037 ± 0.0139 |
| m <sup>3</sup> U    | 0.0902 ± 0.0013 | 0.209 ± 0.0002  | 0.0793 ± 0.0138  | m <sup>6</sup> <sub>6</sub> A  | 0.0087 ± 0.004  |                 | 0.0037 ± 0.0139 |
| m <sup>5</sup> U    | 0.0902 ± 0.0013 | 0.209 ± 0.0002  | 0.0793 ± 0.0138  | i <sup>6</sup> A               | 0.00078 ± 0.005 |                 |                 |
| Ym                  | 0.245 ± 0.0036  | 0.373 ± 0.0004  | 0.23 ± 0.0401    | I                              | 0.017 ± 0.0024  | 0.0685 ± 0.0002 | 0.0111 ± 0.0015 |
| m <sup>1</sup> Y    | 0.0317 ± 0.0004 | 0.0734 ± 0.0001 | 0.0279 ± 0.0048  | m <sup>1</sup> I               | 0.0014 ± 0.0508 |                 |                 |
| m <sup>3</sup> Y    | 0.0317 ± 0.0004 | 0.0734 ± 0.0001 | 0.0279 ± 0.0048  | Gm                             | 0.0193 ± 0.0009 | 0.0228 ± 0.0002 | 0.0111 ± 0.0031 |
| m <sup>3</sup> Um   | 0.0071 ± 0.002  | 0.0419 ± 0.0002 | 0.0139 ± 0.0488  | m <sub>1</sub> G               | 0.138 ± 0.0066  | 0.164 ± 0.0018  | 0.0798 ± 0.023  |
| m <sup>5</sup> Um   | 0.0071 ± 0.002  | 0.0419 ± 0.0002 | 0.0139 ± 0.0488  | m <sub>2</sub> G               | 0.138 ± 0.0066  | 0.164 ± 0.0018  | 0.0798 ± 0.023  |
| ho <sup>5</sup> U   | 0.0048 ± 0.0101 |                 |                  | m <sub>7</sub> G               | 0.138 ± 0.0066  | 0.164 ± 0.0018  | 0.0798 ± 0.023  |
| ncm <sup>5</sup> U  | 0.0459 ± 0.0093 | 0.0067 ± 0.0005 | 0.0302 ± 0.0027  | m <sup>1</sup> Gm              | 0.0040 ± 0.0002 | 0.0352 ± 0.0003 | 0.0028 ± 0.0003 |
| ncm <sup>5</sup> Um | 0.0025 ± 0.0057 |                 |                  | m <sup>2</sup> Gm              | 0.0208 ± 0.0013 | 0.0352 ± 0.0003 | 0.0028 ± 0.0003 |
| mcm <sup>5</sup> U  | 0.0085 ± 0.0028 |                 |                  | m <sup>2</sup> <sub>2</sub> G  | 0.0208 ± 0.0013 | 0.0067 ± 0.0001 | 0.0148 ± 0.0017 |
| cmo <sup>5</sup> U  | 0.0018 ± 0.0028 |                 |                  | m <sup>2</sup> <sub>7</sub> G  | 0.0208 ± 0.0013 |                 | 0.0148 ± 0.0017 |
| chm <sup>5</sup> U  | 0.0018 ± 0.0015 |                 |                  | preQ1                          | 0.0208 ± 0.0013 | 0.0352 ± 0.0003 | 0.0148 ± 0.0017 |
| mcmo <sup>5</sup> U | 0.0146 ± 0.0118 |                 |                  | m <sup>2</sup> <sub>2</sub> Gm | 0.0055 ± 0.0007 |                 |                 |

0  0.5% AvP  1% >5%

**Table S7.** PTM profiles obtained from total RNA extracts of mock-infected Huh7, HeLa, and 293T cells, as described in *Materials and Methods*. Full PTM names are listed in **Table S3**. The abundance of each PTM relative to the combined abundances of the canonical ribonucleotides is calculated as described in *Materials and Method*. Any color change along the gradient carries a  $p < 0.05$  statistical significance.

| PTM                | Intracellular RNA |                 | Virion RNA |                 | PTM                           | Intracellular RNA                                                                    |                 | Virion RNA |                 |
|--------------------|-------------------|-----------------|------------|-----------------|-------------------------------|--------------------------------------------------------------------------------------|-----------------|------------|-----------------|
|                    | Mock              | HIV-1           | Mock       | HIV-1           |                               | Mock                                                                                 | HIV-1           | Mock       | HIV-1           |
| No. PTMs           | 0                 | 36              | 0          | 33              | m <sup>1</sup> A              |                                                                                      | 0.0223 ± 0.0001 |            | 0.024 ± 0.0001  |
| Cm                 |                   | 0.268 ± 0.0003  |            | 0.0416 ± 0.0001 | m <sup>2</sup> A              |                                                                                      | 0.0223 ± 0.0001 |            | 0.024 ± 0.0001  |
| m <sup>3</sup> C   |                   | 0.297 ± 0.0004  |            | 0.0461 ± 0.0001 | m <sup>6</sup> A              |                                                                                      | 0.074 ± 0.0001  |            | 0.0797 ± 0.0001 |
| m <sup>4</sup> C   |                   | 0.459 ± 0.0006  |            | 0.0712 ± 0.0002 | m <sup>8</sup> A              |                                                                                      | 0.0086 ± 0.0001 |            | 0.0093 ± 0.0001 |
| m <sup>5</sup> C   |                   | 0.432 ± 0.0005  |            | 0.0671 ± 0.0002 | m <sup>1</sup> Am             |                                                                                      | 0.0108 ± 0.0001 |            |                 |
| ac <sup>4</sup> C  |                   | 0.563 ± 0.0026  |            | 0.487 ± 0.0094  | m <sub>6</sub> Am             |                                                                                      | 0.0108 ± 0.0001 |            |                 |
| ac <sup>4</sup> Cm |                   | 0.0176 ± 0.0003 |            |                 | m <sup>2</sup> <sub>8</sub> A |                                                                                      | 0.0098 ± 0.0001 |            |                 |
| Y                  |                   | 2.1613 ± 0.3708 |            | 1.7989 ± 0.0204 | m <sup>6</sup> <sub>2</sub> A |                                                                                      | 0.0098 ± 0.0001 |            |                 |
| D                  |                   | 2.52 ± 0.001    |            | 0.115 ± 0.0001  | m <sup>6</sup> <sub>6</sub> A |                                                                                      | 0.0098 ± 0.0001 |            |                 |
| Um                 |                   | 0.326 ± 0.0004  |            | 0.0315 ± 0.0221 | I                             |                                                                                      | 0.152 ± 0.0002  |            | 0.0253 ± 0.0007 |
| m <sup>3</sup> U   |                   | 0.383 ± 0.0005  |            | 0.0036 ± 0.0025 | m <sup>1</sup> I              |                                                                                      | 0.0266 ± 0.0004 |            | 0.284 ± 0.0116  |
| m <sup>5</sup> U   |                   | 0.383 ± 0.0005  |            | 0.0036 ± 0.0025 | Gm                            |                                                                                      | 0.0278 ± 0.0003 |            | 0.0002 ± 0.0001 |
| Ym                 |                   | 0.504 ± 0.0007  |            | 0.0487 ± 0.0342 | m <sup>1</sup> G              |                                                                                      | 0.199 ± 0.0021  |            | 0.0013 ± 0.0004 |
| m <sup>1</sup> Y   |                   | 0.135 ± 0.0001  |            | 0.0013 ± 0.0008 | m <sup>2</sup> G              |                                                                                      | 0.199 ± 0.0021  |            | 0.0013 ± 0.0004 |
| m <sup>3</sup> Y   |                   | 0.135 ± 0.0001  |            | 0.0013 ± 0.0008 | m <sup>7</sup> G              |                                                                                      | 0.199 ± 0.0021  |            | 0.0013 ± 0.0004 |
| m <sup>3</sup> Um  |                   |                 |            | 0.0068 ± 0.0001 | m <sup>1</sup> Gm             |                                                                                      | 0.0251 ± 0.0001 |            | 0.0009 ± 0.0001 |
| m <sup>5</sup> Um  |                   |                 |            | 0.0068 ± 0.0001 | m <sup>2</sup> Gm             |                                                                                      | 0.0251 ± 0.0001 |            | 0.0009 ± 0.0001 |
| f <sup>5</sup> Um  |                   |                 |            | 0.0038 ± 0.0012 | m <sup>2</sup> <sub>2</sub> G |                                                                                      | 0.132 ± 0.0003  |            | 0.0047 ± 0.0001 |
| ho <sup>5</sup> U  |                   |                 |            | 0.0822 ± 0.0427 | m <sup>2</sup> <sub>7</sub> G |                                                                                      | 0.132 ± 0.0003  |            | 0.0047 ± 0.0001 |
| ncm <sup>5</sup> U |                   | 0.0451 ± 0.0002 |            |                 | preQ1                         |                                                                                      | 0.132 ± 0.0003  |            | 0.0047 ± 0.0001 |
| Am                 |                   | 0.389 ± 0.0007  |            | 0.419 ± 0.0003  | 0                             |  |                 |            |                 |

**Table S8.** PTM profiles of isolated HIV-1 RNA from 293T cell lysates and virions, as described in *Materials and Methods*. Full PTM names are listed in **Table S3**. The abundance of each PTM relative to the combined abundances of the canonical ribonucleotides is calculated as described in *Materials and Methods*. Any color change along the gradient carries a  $p < 0.05$  statistical significance.



| PTM                           | Mock | ZIKV               | DENV               | HCV                | PV                 | PTM                            | Mock | ZIKV              | DENV              | HCV               | PV                |
|-------------------------------|------|--------------------|--------------------|--------------------|--------------------|--------------------------------|------|-------------------|-------------------|-------------------|-------------------|
| Totals                        | 0    | 32                 | 39                 | 42                 | 41                 | mo <sup>5</sup> U              |      |                   |                   | 0.0029<br>±0.0003 | 0.0025<br>±0.0003 |
| Cm                            |      | 0.0859<br>±0.0212  | 0.103<br>±0.0009   | 0.126<br>±0.0004   | 0.113<br>±0.011    | Am                             |      | 0.325<br>±0.1043  | 0.376<br>±0.0032  | 0.56<br>±0.0039   | 0.663<br>±0.0813  |
| m <sup>3</sup> C              |      | 0.095<br>±0.0234   | 0.114<br>±0.001    | 0.14<br>±0.0004    | 0.125<br>±0.0121   | m <sup>1</sup> A               |      | 0.0187<br>±0.006  | 0.0217<br>±0.0001 | 0.0323<br>±0.0002 | 0.0383<br>±0.0046 |
| m <sup>4</sup> C              |      | 0.147<br>±0.0363   | 0.176<br>±0.0016   | 0.216<br>±0.0007   | 0.192<br>±0.0187   | m <sup>2</sup> A               |      | 0.0187<br>±0.006  | 0.0217<br>±0.0001 | 0.0323<br>±0.0002 | 0.0383<br>±0.0046 |
| m <sup>5</sup> C              |      | 0.138<br>±0.0341   | 0.165<br>±0.0015   | 0.203<br>±0.0006   | 0.181<br>±0.0176   | m <sup>6</sup> A               |      | 0.0619<br>±0.0198 | 0.0716<br>±0.0006 | 0.107<br>±0.0007  | 0.126<br>±0.0154  |
| m <sup>4</sup> <sub>4</sub> C |      |                    |                    | 0.0001<br>±0.0001  |                    | m <sup>8</sup> A               |      | 0.0072<br>±0.0023 | 0.0083<br>±0.0001 | 0.0124<br>±0.0001 | 0.0147<br>±0.0018 |
| m <sup>5</sup> Cm             |      |                    |                    | 0.0005<br>±0.0001  |                    | m <sup>1</sup> Am              |      | 0.0033<br>±0.0011 | 0.0063<br>±0.0001 | 0.0098<br>±0.0002 | 0.0089<br>±0.0111 |
| ac <sup>4</sup> C             |      | 0.532<br>±0.1809   | 0.612<br>±0.0051   | 0.514<br>±0.0057   | 0.446<br>±0.0513   | m <sup>6</sup> Am              |      | 0.0033<br>±0.0011 | 0.0063<br>±0.0001 | 0.0098<br>±0.0002 | 0.0089<br>±0.0111 |
| ac <sup>4</sup> Cm            |      |                    | 0.0026<br>±0.0002  |                    | 0.0045<br>±0.0056  | m <sup>2</sup> <sub>8</sub> A  |      | 0.003<br>±0.001   | 0.0057<br>±0.0001 | 0.0089<br>±0.0002 | 0.0081<br>±0.0101 |
| Y                             |      | 1.4314 ±<br>0.0334 | 1.9815 ±<br>0.0253 | 2.0089 ±<br>0.0195 | 1.9706 ±<br>0.0244 | m <sup>6</sup> <sub>2</sub> A  |      | 0.003<br>±0.001   | 0.0057<br>±0.0001 | 0.0089<br>±0.0002 | 0.0081<br>±0.0101 |
| D                             |      | 0.0194<br>±0.0076  | 0.115<br>±0.0011   | 0.167<br>±0.0003   | 0.0701<br>±0.0832  | m <sup>6</sup> <sub>6</sub> A  |      | 0.003<br>±0.001   | 0.0057<br>±0.0001 | 0.0089<br>±0.0002 | 0.0081<br>±0.0101 |
| Um                            |      | 0.0765<br>±0.0302  | 0.0908<br>±0.0013  | 0.109<br>±0.0007   | 0.113<br>±0.0143   | I                              |      | 0.001<br>±0.0004  | 0.0076<br>±0.0001 | 0.0095<br>±0.0007 | 0.0066<br>±0.0078 |
| m <sup>3</sup> U              |      | 0.0211<br>±0.0083  | 0.0297<br>±0.0004  | 0.0428<br>±0.0002  | 0.0456<br>±0.0058  | m <sup>1</sup> I               |      | 0.0741<br>±0.0313 | 0.115<br>±0.0012  | 0.0537<br>±0.0022 | 0.0344<br>±0.0309 |
| m <sup>5</sup> U              |      | 0.0211<br>±0.0083  | 0.0297<br>±0.0004  | 0.0428<br>±0.0002  | 0.0456<br>±0.0058  | Gm                             |      | 0.0081<br>±0.0054 | 0.0126<br>±0.0002 | 0.0124<br>±0.0002 | 0.0134<br>±0.0036 |
| Ym                            |      | 0.118<br>±0.0466   | 0.14<br>±0.002     | 0.169<br>±0.0011   | 0.174<br>±0.0221   | m <sup>1</sup> G               |      | 0.058<br>±0.0392  | 0.0906<br>±0.0021 | 0.0889<br>±0.002  | 0.096<br>±0.0262  |
| m <sup>1</sup> Y              |      | 0.0074<br>±0.0029  | 0.0104<br>±0.0001  | 0.015<br>±0.0001   | 0.016<br>±0.002    | m <sup>2</sup> G               |      | 0.058<br>±0.0392  | 0.0906<br>±0.0021 | 0.0889<br>±0.002  | 0.096<br>±0.0262  |
| m <sup>3</sup> Y              |      | 0.0074<br>±0.0029  | 0.0104<br>±0.0001  | 0.015<br>±0.0001   | 0.016<br>±0.002    | m <sup>7</sup> G               |      | 0.058<br>±0.0392  | 0.0906<br>±0.0021 | 0.0889<br>±0.002  | 0.096<br>±0.0262  |
| m <sup>5</sup> D              |      | 0.0013<br>±0.0009  |                    | 0.0003<br>±0.0001  |                    | m <sup>1</sup> Gm              |      |                   | 0.002<br>±0.0001  | 0.0023<br>±0.0001 | 0.001<br>±0.0012  |
| m <sup>3</sup> Um             |      |                    | 0.0051<br>±0.0001  | 0.01<br>±0.0001    | 0.0017<br>±0.0005  | m <sup>2</sup> Gm              |      |                   | 0.002<br>±0.0001  | 0.0023<br>±0.0001 | 0.001<br>±0.0012  |
| m <sup>5</sup> Um             |      |                    | 0.0051<br>±0.0001  | 0.01<br>±0.0001    | 0.0017<br>±0.0005  | m <sup>2</sup> <sub>2</sub> G  |      |                   | 0.0103<br>±0.0002 | 0.0122<br>±0.0001 | 0.005<br>±0.0061  |
| f <sup>5</sup> U              |      |                    |                    | 0.005<br>±0.0002   |                    | m <sup>2</sup> <sub>7</sub> G  |      |                   | 0.0103<br>±0.0002 | 0.0122<br>±0.0001 | 0.005<br>±0.0061  |
| ho <sup>5</sup> U             |      | 0.0094<br>±0.0097  |                    |                    | 0.0278<br>±0.0269  | preQ1                          |      |                   | 0.0103<br>±0.0002 | 0.0122<br>±0.0001 | 0.005<br>±0.0061  |
| ncm <sup>5</sup> U            |      |                    | 0.0031<br>±0.0001  |                    | 0.002<br>±0.0016   | m <sup>2</sup> <sub>2</sub> Gm |      | 0.0066<br>±0.0051 | 0.001<br>±0.0001  |                   | 0.0183<br>±0.0022 |
| ncm <sup>5</sup> Um           |      |                    |                    | 0.0055<br>±0.0001  |                    | 0                              |      |                   |                   |                   |                   |

**Table S9A.** PTM profiles of viral RNA isolated from cell lysates of mock-, ZIKV-, DENV-, HCV-, and PV-infected Huh7 cells, as described in *Materials and Methods*. Full PTM names are listed in **Table S3**. The abundance of each PTM relative to the combined abundances of the canonical ribonucleotides is calculated as described in *Materials and Methods*. Any color change along the gradient carries a p < 0.05 statistical significance.

| PTM                            | Mock | ZIKV            | DENV            | HCV             | PV              | PTM                            | Mock                                                                                 | ZIKV            | DENV            | HCV             | PV              |
|--------------------------------|------|-----------------|-----------------|-----------------|-----------------|--------------------------------|--------------------------------------------------------------------------------------|-----------------|-----------------|-----------------|-----------------|
| Totals                         | 0    | 41              | 37              | 40              | 40              | nm <sup>5</sup> U              |                                                                                      |                 |                 | 0.0057 ± 0.0001 |                 |
| Cm                             |      | 0.111 ± 0.0004  | 0.183 ± 0.017   | 0.167 ± 0.0085  | 0.113 ± 0.0002  | ncm <sup>5</sup> U             |                                                                                      | 0.0077 ± 0.0018 | 0.0127 ± 0.0036 |                 | 0.0037 ± 0.0002 |
| m <sup>3</sup> C               |      | 0.122 ± 0.0004  | 0.203 ± 0.0189  | 0.185 ± 0.0095  | 0.125 ± 0.0002  | ncm <sup>5</sup> Um            |                                                                                      |                 |                 | 0.0128 ± 0.0015 |                 |
| m <sup>4</sup> C               |      | 0.189 ± 0.0007  | 0.313 ± 0.0291  | 0.286 ± 0.0147  | 0.192 ± 0.0004  | mcm <sup>5</sup> U             |                                                                                      |                 | 0.0115 ± 0.0118 |                 | 0.0074 ± 0.0003 |
| m <sup>5</sup> C               |      | 0.178 ± 0.0007  | 0.295 ± 0.0275  | 0.27 ± 0.0138   | 0.181 ± 0.0003  | Am                             |                                                                                      | 0.433 ± 0.0053  | 0.521 ± 0.0765  | 0.33 ± 0.0208   | 0.461 ± 0.002   |
| m <sup>4</sup> <sub>4</sub> C  |      | 0.0003 ± 0.0001 |                 | 0.0014 ± 0.0001 |                 | m <sup>1</sup> A               |                                                                                      | 0.025 ± 0.0003  | 0.03 ± 0.0044   | 0.019 ± 0.0012  | 0.0266 ± 0.0001 |
| m <sup>5</sup> Cm              |      | 0.0016 ± 0.0001 |                 | 0.0081 ± 0.0001 |                 | m <sup>2</sup> A               |                                                                                      | 0.025 ± 0.0003  | 0.03 ± 0.0044   | 0.019 ± 0.0012  | 0.0266 ± 0.0001 |
| m <sup>4</sup> <sub>4</sub> Cm |      |                 |                 | 0.07 ± 0.0194   |                 | m <sup>6</sup> A               |                                                                                      | 0.0824 ± 0.001  | 0.0992 ± 0.0145 | 0.0627 ± 0.0039 | 0.0878 ± 0.0003 |
| ac <sup>4</sup> C              |      | 0.532 ± 0.0073  | 0.46 ± 0.0998   | 0.49 ± 0.0184   | 0.441 ± 0.0022  | m <sup>8</sup> A               |                                                                                      | 0.0096 ± 0.0001 | 0.0115 ± 0.0016 | 0.0073 ± 0.0004 | 0.0102 ± 0.0001 |
| ac <sup>4</sup> Cm             |      | 0.001 ± 0.0001  |                 |                 | 0.0011 ± 0.0001 | m <sup>1</sup> Am              |                                                                                      | 0.0065 ± 0.0001 | 0.0039 ± 0.0017 |                 | 0.0081 ± 0.0001 |
| f <sup>5</sup> C               |      |                 |                 | 0.0107 ± 0.0034 | 0.004 ± 0.0001  | m <sup>6</sup> Am              |                                                                                      | 0.0065 ± 0.0001 | 0.0039 ± 0.0017 |                 | 0.0081 ± 0.0001 |
| f <sup>5</sup> Cm              |      |                 |                 | 0.07 ± 0.0184   |                 | m <sup>2</sup> <sub>8</sub> A  |                                                                                      | 0.0059 ± 0.0001 | 0.0036 ± 0.0015 |                 | 0.0074 ± 0.0001 |
| hm <sup>5</sup> C              |      |                 |                 | 0.0057 ± 0.0052 |                 | m <sup>6</sup> <sub>2</sub> A  |                                                                                      | 0.0059 ± 0.0001 | 0.0036 ± 0.0015 |                 | 0.0074 ± 0.0001 |
| Y                              |      | 1.38 ± 0.0284   | 1.6645 ± 0.3268 | 1.7295 ± 0.1907 | 1.3306 ± 0.0065 | m <sup>6</sup> <sub>6</sub> A  |                                                                                      | 0.0059 ± 0.0001 | 0.0036 ± 0.0015 |                 | 0.0074 ± 0.0001 |
| D                              |      | 0.132 ± 0.0049  | 0.371 ± 0.023   | 0.502 ± 0.0361  | 0.147 ± 0.0005  | I                              |                                                                                      | 0.0121 ± 0.0001 | 0.0438 ± 0.0039 | 0.037 ± 0.0059  | 0.0131 ± 0.0007 |
| Um                             |      | 0.0925 ± 0.0143 | 0.127 ± 0.0361  | 0.119 ± 0.0169  | 0.0836 ± 0.0002 | m <sup>1</sup> I               |                                                                                      |                 |                 |                 | 0.0269 ± 0.0009 |
| m <sup>3</sup> U               |      | 0.0308 ± 0.0047 | 0.0582 ± 0.0165 | 0.0509 ± 0.0072 | 0.0252 ± 0.0001 | Gm                             |                                                                                      | 0.0114 ± 0.0003 | 0.0153 ± 0.0051 | 0.0148 ± 0.0022 | 0.0109 ± 0.0002 |
| m <sup>5</sup> U               |      | 0.0308 ± 0.0047 | 0.0582 ± 0.0165 | 0.0509 ± 0.0072 | 0.0252 ± 0.0001 | m <sup>1</sup> G               |                                                                                      | 0.082 ± 0.0028  | 0.11 ± 0.0373   | 0.106 ± 0.0161  | 0.078 ± 0.0015  |
| Ym                             |      | 0.143 ± 0.0222  | 0.197 ± 0.0561  | 0.184 ± 0.0262  | 0.129 ± 0.0003  | m <sup>2</sup> G               |                                                                                      | 0.082 ± 0.0028  | 0.11 ± 0.0373   | 0.106 ± 0.0161  | 0.078 ± 0.0015  |
| m <sup>1</sup> Y               |      | 0.0108 ± 0.0016 | 0.0205 ± 0.0058 | 0.0179 ± 0.0025 | 0.0088 ± 0.0001 | m <sup>7</sup> G               |                                                                                      | 0.082 ± 0.0028  | 0.11 ± 0.0373   | 0.106 ± 0.0161  | 0.078 ± 0.0015  |
| m <sup>3</sup> Y               |      | 0.0108 ± 0.0016 | 0.0205 ± 0.0058 | 0.0179 ± 0.0025 | 0.0088 ± 0.0001 | m <sup>1</sup> Gm              |                                                                                      | 0.002 ± 0.0001  | 0.0048 ± 0.0006 | 0.0054 ± 0.0004 | 0.0019 ± 0.0001 |
| m <sup>5</sup> D               |      | 0.001 ± 0.0005  |                 | 0.0728 ± 0.0064 | 0.001 ± 0.0002  | m <sup>2</sup> Gm              |                                                                                      | 0.002 ± 0.0001  | 0.0048 ± 0.0006 | 0.0054 ± 0.0004 | 0.0019 ± 0.0001 |
| m <sup>3</sup> Um              |      |                 | 0.0162 ± 0.0007 | 0.0081 ± 0.0005 |                 | m <sup>2</sup> <sub>2</sub> G  |                                                                                      | 0.0107 ± 0.0001 | 0.0254 ± 0.0032 | 0.0286 ± 0.0025 | 0.0101 ± 0.0001 |
| m <sup>5</sup> Um              |      |                 | 0.0162 ± 0.0007 | 0.0081 ± 0.0005 |                 | m <sup>2</sup> <sub>7</sub> G  |                                                                                      | 0.0107 ± 0.0001 | 0.0254 ± 0.0032 | 0.0286 ± 0.0025 | 0.0101 ± 0.0001 |
| f <sup>5</sup> U               |      | 0.006 ± 0.0031  |                 |                 |                 | preQ1                          |                                                                                      | 0.0107 ± 0.0001 | 0.0254 ± 0.0032 | 0.0286 ± 0.0025 | 0.0101 ± 0.0001 |
| f <sup>5</sup> Um              |      | 0.0056 ± 0.0001 |                 |                 | 0.0146 ± 0.0011 | m <sup>2</sup> <sub>2</sub> Gm |                                                                                      |                 |                 | 0.0059 ± 0.0016 |                 |
| ho <sup>5</sup> U              |      | 0.0236 ± 0.0259 |                 |                 |                 | 0                              |  |                 |                 |                 |                 |

**Table S9B.** PTM profiles of viral RNA isolated from virions of mock-, ZIKV-, DENV-, HCV-, and PV-infected Huh7 cells, as described in *Materials and Methods*. Full PTM names are listed in **Table S3**. The abundance of each PTM relative to the combined abundances of the canonical ribonucleotides is calculated as described in *Materials and Methods*. Any color change along the gradient carries a  $p < 0.05$  statistical significance.

| PTM                           | Huh7            | ZIKV            | Arsenite          | Poly(I:C)       | PTM                               | Huh7            | ZIKV            | Arsenite        | Poly(I:C)       |
|-------------------------------|-----------------|-----------------|-------------------|-----------------|-----------------------------------|-----------------|-----------------|-----------------|-----------------|
| No. PTMs                      | 47              | 44              | 47                | 36              | mcm <sup>5</sup> s <sup>2</sup> U |                 |                 | 0.0247 ± 0.0001 |                 |
| Cm                            | 0.0899 ± 0.0124 | 0.0976 ± 0.0003 | 0.0692 ± 0.0153   | 0.15 ± 0.0029   | mcmo <sup>5</sup> U               | 0.0146 ± 0.0118 |                 | 0.0056 ± 0.0013 |                 |
| m <sup>3</sup> C              | 0.0995 ± 0.0137 | 0.108 ± 0.0004  | 0.0766 ± 0.0169   | 0.165 ± 0.0032  | mchm <sup>5</sup> U               | 0.0146 ± 0.0118 |                 | 0.0056 ± 0.0013 |                 |
| m <sup>4</sup> C              | 0.154 ± 0.0213  | 0.167 ± 0.0006  | 0.118 ± 0.0261    | 0.256 ± 0.0049  | Am                                | 0.304 ± 0.016   | 0.469 ± 0.0006  | 0.409 ± 0.0202  | 0.403 ± 0.1008  |
| m <sup>5</sup> C              | 0.145 ± 0.02    | 0.157 ± 0.0006  | 0.111 ± 0.0245    | 0.241 ± 0.0047  | m <sup>1</sup> A                  | 0.0176 ± 0.0009 | 0.0271 ± 0.0001 | 0.0234 ± 0.0011 | 0.0231 ± 0.0057 |
| m <sup>4</sup> <sub>4</sub> C |                 | 0.012 ± 0.0007  | 0.000531 ± 0.0002 |                 | m <sup>2</sup> A                  | 0.0176 ± 0.0009 | 0.0271 ± 0.0001 | 0.0234 ± 0.0011 | 0.0231 ± 0.0057 |
| m <sup>5</sup> Cm             |                 | 0.0722 ± 0.0047 | 0.00319 ± 0.0013  |                 | m <sup>6</sup> A                  | 0.0579 ± 0.003  | 0.0893 ± 0.0001 | 0.0779 ± 0.0038 | 0.0768 ± 0.0192 |
| ac <sup>4</sup> C             | 0.692 ± 0.0508  | 0.514 ± 0.0003  | 0.549 ± 0.0269    | 0.483 ± 0.0124  | m <sup>8</sup> A                  | 0.0067 ± 0.0003 | 0.0104 ± 0.0001 | 0.0091 ± 0.0004 | 0.0089 ± 0.0022 |
| ac <sup>4</sup> Cm            | 0.0137 ± 0.002  | 0.0025 ± 0.0023 | 0.00489 ± 0.0025  |                 | m <sup>1</sup> Am                 | 0.0096 ± 0.0044 | 0.0099 ± 0.0003 | 0.0055 ± 0.0026 | 0.0052 ± 0.0019 |
| Y                             | 2.5851 ± 0.0578 | 1.8937 ± 0.0338 | 2.1475 ± 0.0963   | 1.6601 ± 0.0244 | m <sup>6</sup> Am                 | 0.0096 ± 0.0044 | 0.0099 ± 0.0003 | 0.0055 ± 0.0026 | 0.0052 ± 0.0019 |
| D                             | 0.333 ± 0.066   | 0.142 ± 0.0013  | 0.244 ± 0.0567    | 0.349 ± 0.0057  | m <sup>2</sup> <sub>8</sub> A     | 0.0087 ± 0.004  | 0.0090 ± 0.0003 | 0.0050 ± 0.0024 | 0.0047 ± 0.0017 |
| Um                            | 0.158 ± 0.0023  | 0.0823 ± 0.0007 | 0.0452 ± 0.002    | 0.105 ± 0.0029  | m <sup>6</sup> <sub>2</sub> A     | 0.0087 ± 0.004  | 0.0090 ± 0.0003 | 0.0050 ± 0.0024 | 0.0048 ± 0.0017 |
| m <sup>3</sup> U              | 0.0902 ± 0.0013 | 0.0244 ± 0.0002 | 0.00734 ± 0.0003  | 0.0398 ± 0.0011 | m <sup>6</sup> <sub>6</sub> A     | 0.0087 ± 0.004  | 0.0090 ± 0.0003 | 0.0050 ± 0.0024 | 0.0048 ± 0.0017 |
| m <sup>5</sup> U              | 0.0902 ± 0.0013 | 0.0244 ± 0.0002 | 0.00734 ± 0.0003  | 0.0398 ± 0.0011 | i <sup>6</sup> A                  | 0.0008 ± 0.005  |                 | 0.0022 ± 0.0002 |                 |
| Ym                            | 0.245 ± 0.0036  | 0.127 ± 0.001   | 0.0698 ± 0.0031   | 0.163 ± 0.0045  | I                                 | 0.017 ± 0.0024  | 0.0026 ± 0.0023 | 0.0893 ± 0.0061 | 0.745 ± 0.0104  |
| m <sup>1</sup> Y              | 0.0317 ± 0.0004 | 0.0086 ± 0.0001 | 0.00258 ± 0.0001  | 0.014 ± 0.0003  | m <sup>1</sup> I                  | 0.0014 ± 0.0508 | 0.163 ± 0.0003  |                 | 0.0938 ± 0.0012 |
| m <sup>3</sup> Y              | 0.0317 ± 0.0004 | 0.0086 ± 0.0001 | 0.00258 ± 0.0001  | 0.014 ± 0.0003  | Gm                                | 0.0193 ± 0.0009 | 0.0121 ± 0.0002 | 0.0139 ± 0.0005 | 0.0154 ± 0.0019 |
| m <sup>3</sup> Um             | 0.0071 ± 0.002  | 0.0034 ± 0.0003 | 0.00349 ± 0.0007  | 0.0128 ± 0.0036 | m <sup>1</sup> G                  | 0.138 ± 0.0066  | 0.0869 ± 0.0015 | 0.0997 ± 0.0037 | 0.11 ± 0.0138   |
| m <sup>5</sup> Um             | 0.0071 ± 0.002  | 0.0034 ± 0.0003 | 0.00349 ± 0.0007  | 0.0128 ± 0.0036 | m <sup>2</sup> G                  | 0.138 ± 0.0066  | 0.0869 ± 0.0015 | 0.0997 ± 0.0037 | 0.11 ± 0.0138   |
| f <sup>5</sup> Um             |                 |                 | 0.00768 ± 0.0163  |                 | m <sup>7</sup> G                  | 0.138 ± 0.0066  | 0.0869 ± 0.0015 | 0.0997 ± 0.0037 | 0.11 ± 0.0138   |
| ho <sup>5</sup> U             | 0.0048 ± 0.0101 | 0.0068 ± 0.0013 | 0.0274 ± 0.0044   |                 | m <sup>1</sup> Gm                 | 0.0040 ± 0.0003 | 0.0044 ± 0.0001 | 0.0023 ± 0.0008 | 0.0049 ± 0.0003 |
| ncm <sup>5</sup> U            | 0.0459 ± 0.0093 | 0.0013 ± 0.0023 | 0.0339 ± 0.0251   |                 | m <sup>2</sup> Gm                 | 0.0040 ± 0.0003 | 0.0044 ± 0.0001 | 0.0023 ± 0.0008 | 0.0049 ± 0.0003 |
| ncm <sup>5</sup> Um           | 0.0025 ± 0.0057 |                 |                   |                 | m <sup>2</sup> <sub>2</sub> G     | 0.0208 ± 0.0017 | 0.0233 ± 0.0006 | 0.0119 ± 0.0044 | 0.0257 ± 0.0019 |
| mcm <sup>5</sup> U            | 0.0085 ± 0.0028 |                 |                   |                 | m <sup>2</sup> <sub>7</sub> G     | 0.0208 ± 0.0017 | 0.0233 ± 0.0006 | 0.0119 ± 0.0044 | 0.0257 ± 0.0019 |
| cmo <sup>5</sup> U            | 0.0018 ± 0.0028 | 0.0001 ± 0.0001 | 0.0147 ± 0.0132   |                 | preQ1                             | 0.0208 ± 0.0017 | 0.0233 ± 0.0006 | 0.0119 ± 0.0044 | 0.0257 ± 0.0019 |
| chm <sup>5</sup> U            | 0.0018 ± 0.0029 | 0.0001 ± 0.0001 | 0.0147 ± 0.0132   |                 | m <sup>2</sup> <sub>2</sub> Gm    | 0.0055 ± 0.0007 | 0.0083 ± 0.0012 |                 |                 |

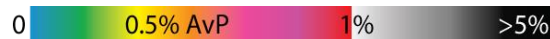

**Table S10.** PTM profiles obtained from total RNA extracts of mock-, ZIKV-infected, arsenite-treated, and poly(I:C)-transfected Huh7 cells, as described in *Materials and Methods*. Full PTM names are listed in **Table S3**. The abundance of each PTM relative to the combined abundances of the canonical ribonucleotides is calculated as described in *Materials and Methods*. Any color change along the gradient carries a  $p < 0.05$  statistical significance.

| <b>N6-methyl adenosine counts per genome</b> |                     |                     |        |                     |        |        |        |
|----------------------------------------------|---------------------|---------------------|--------|---------------------|--------|--------|--------|
| ZIKV                                         |                     | DENV                |        | HCV                 |        | PV     |        |
| Lysate <sup>‡</sup>                          | Virion <sup>‡</sup> | Lysate <sup>‡</sup> | Virion | Lysate <sup>‡</sup> | Virion | Lysate | Virion |
| 7.4                                          | 11.4                | 13.6                | 9.7    | 27.6                | 21.5   | 10.8   | 5.4    |

**Table S11:** N6-methyl adenosine (m<sup>6</sup>A) modifications per genome of each virus. Incidence of m<sup>6</sup>A modification was calculated by using the relative abundances of all adenosine species in the sample, which corresponded to the total number of adenosines present in the genome's sequence. The ratio between the abundance of m<sup>6</sup>A and the total abundance of adenosine species provided the incidence of m<sup>6</sup>A modification. ‡ indicates a sample in which the number of m<sup>6</sup>A modifications has previously been reported (27,28).

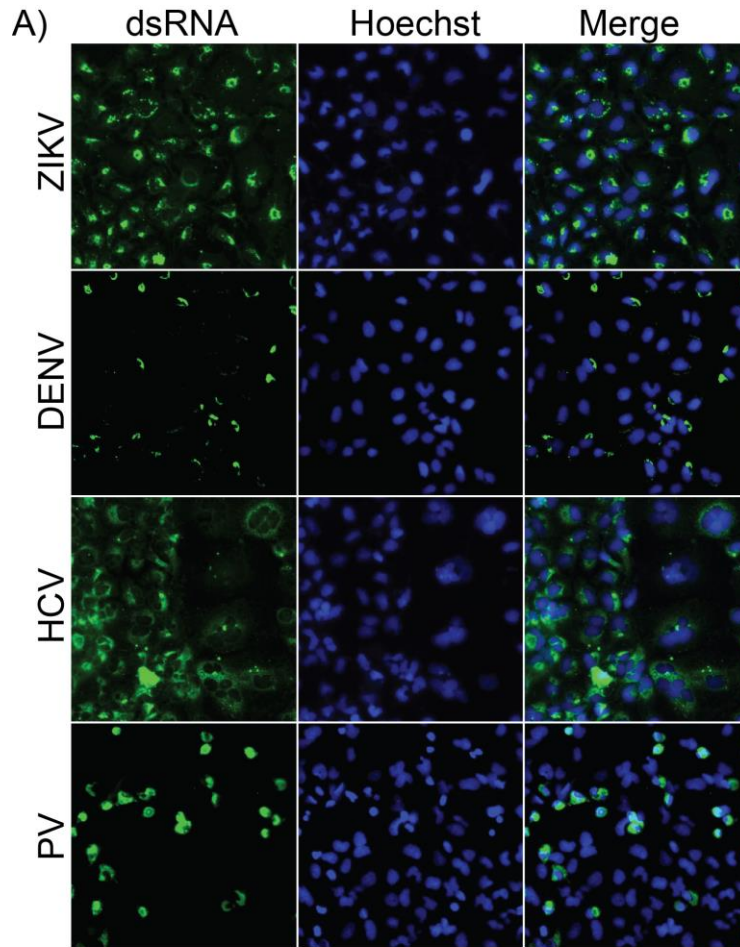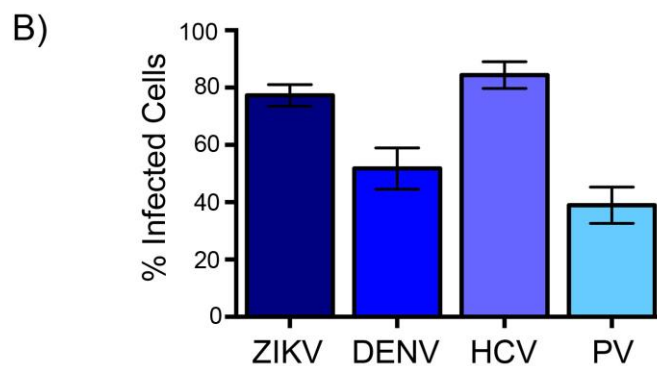

**Figure S1.** ZIKV, DENV, HCV and PV Infectivity Assay. Huh7 cells were infected with virus at the MOI described in the **Materials and Methods**. At specific days post-infection the cells were fixed, permeabilized and prepared for immunofluorescence analysis. Virus-infected cells were detected with an antibody to double-stranded RNA and Alexa Fluor 488 conjugated goat anti-mouse antibody, and the nucleus of each cell was stained with Hoechst 33258. B) Quantification of infected cells. Percent infected cells are from three independent experiments, where at least 100 cells/field-of-view were counted. SD of the mean is shown.

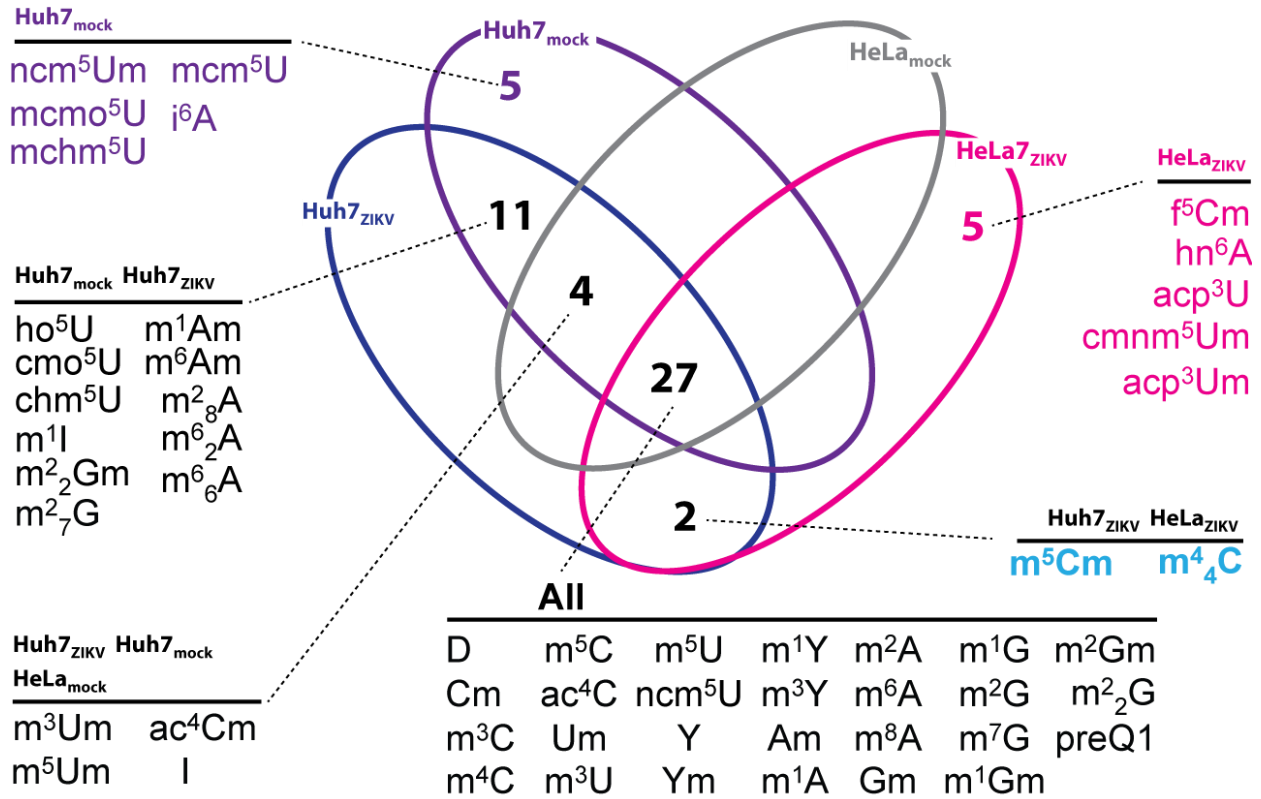

**Figure S2.** Venn diagram generated from the PTM profiles of total RNA extracts obtained from mock- and ZIKV-infected Huh7 and HeLa cells. These diagrams were based exclusively on the presence/absence of each PTM, while comprehensive data displaying abundance variations are reported separately in **Table S5**. Full PTM names are listed in **Table S3**.

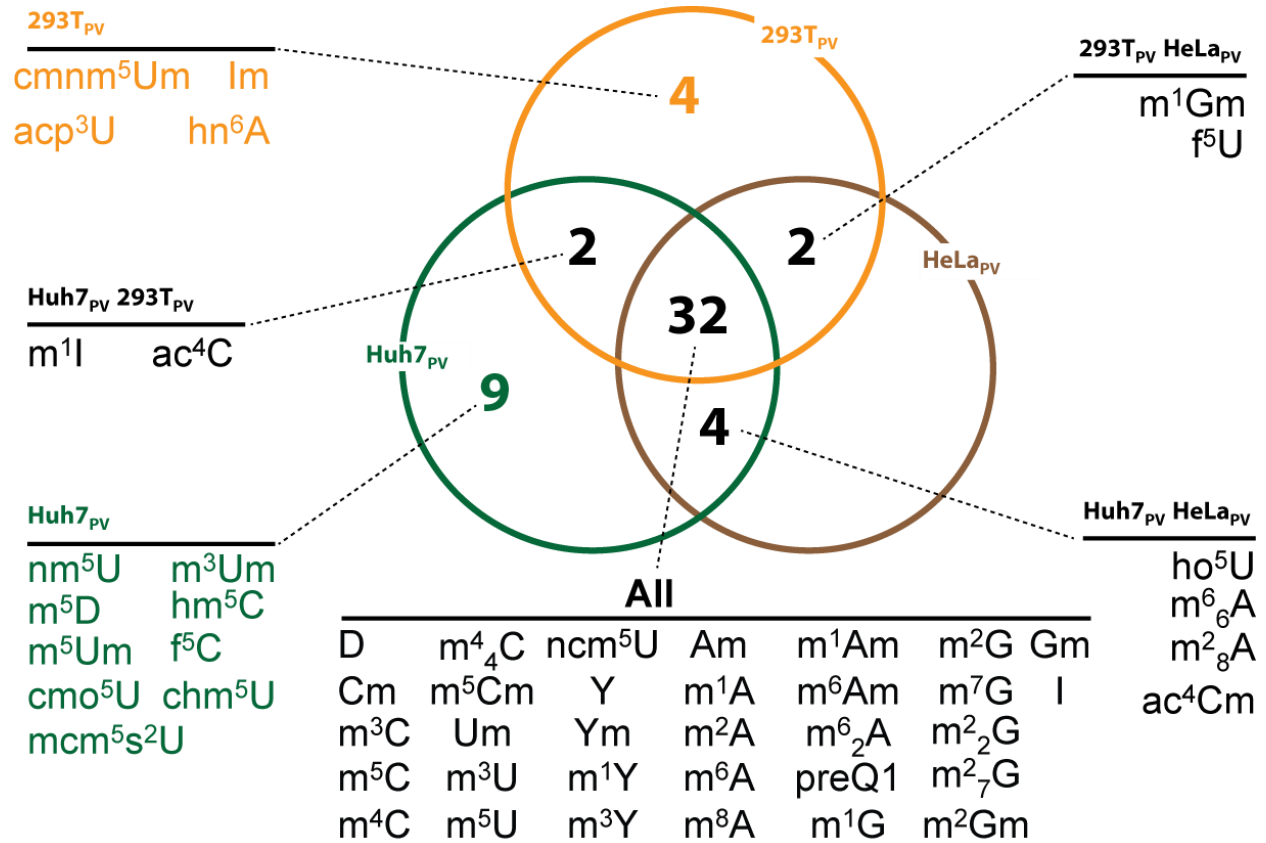

**Figure S3.** Venn diagram generated from the PTM profiles of total RNA extracts obtained from Huh7, HeLa, and 293T cells infected with PV. These diagrams were based exclusively on the presence/absence of each PTM, while comprehensive data displaying abundance variations are reported separately in **Table S6**. Full PTM names are listed in **Table S3**.

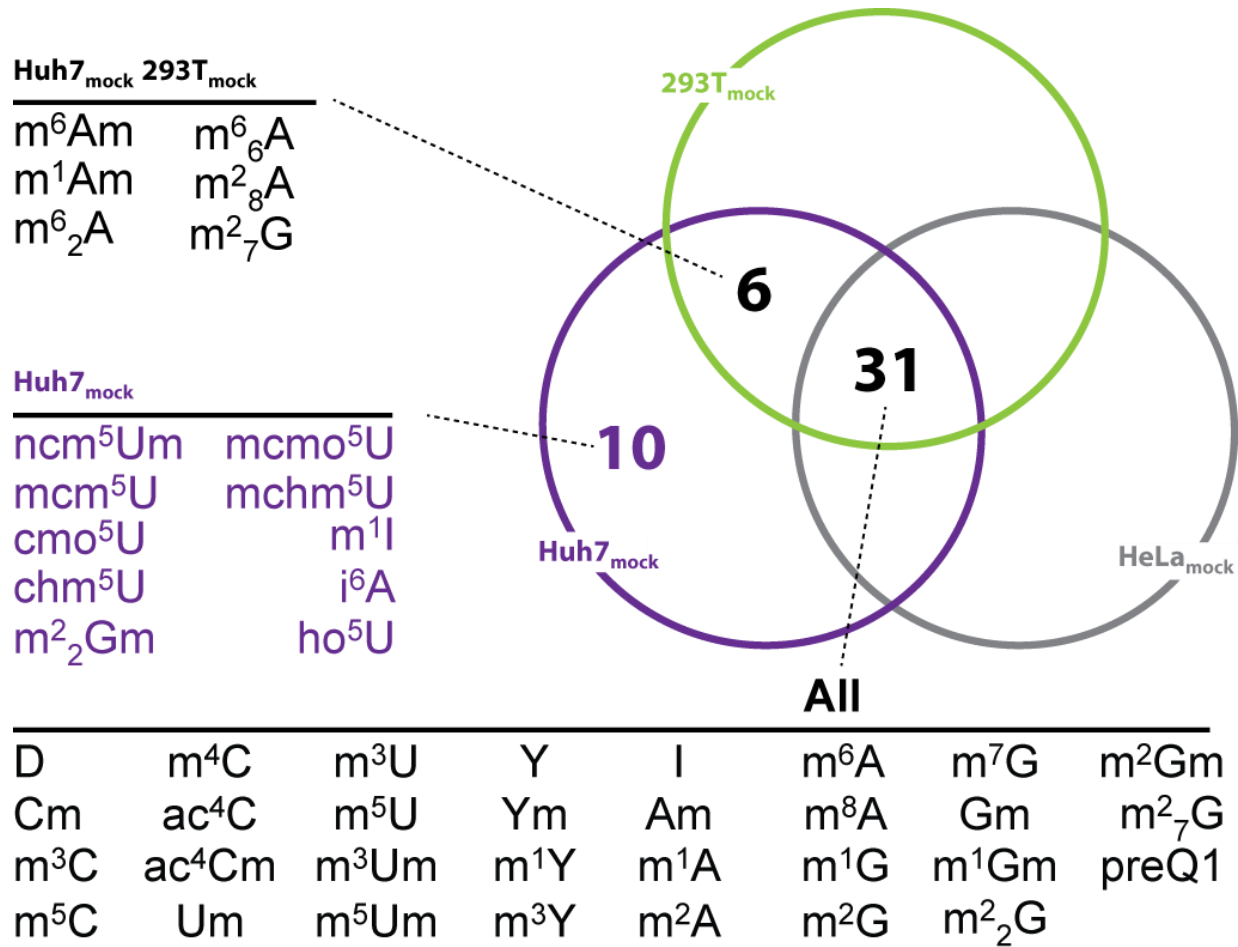

**Figure S4.** Venn diagram generated from the PTM profiles of total RNA extracts obtained from mock-infected Huh7, HeLa, and 293T cells. These diagrams were based exclusively on the presence/absence of each PTM, while comprehensive data displaying abundance variations are reported separately in **Table S7**. Full PTM names are listed in **Table S3**.



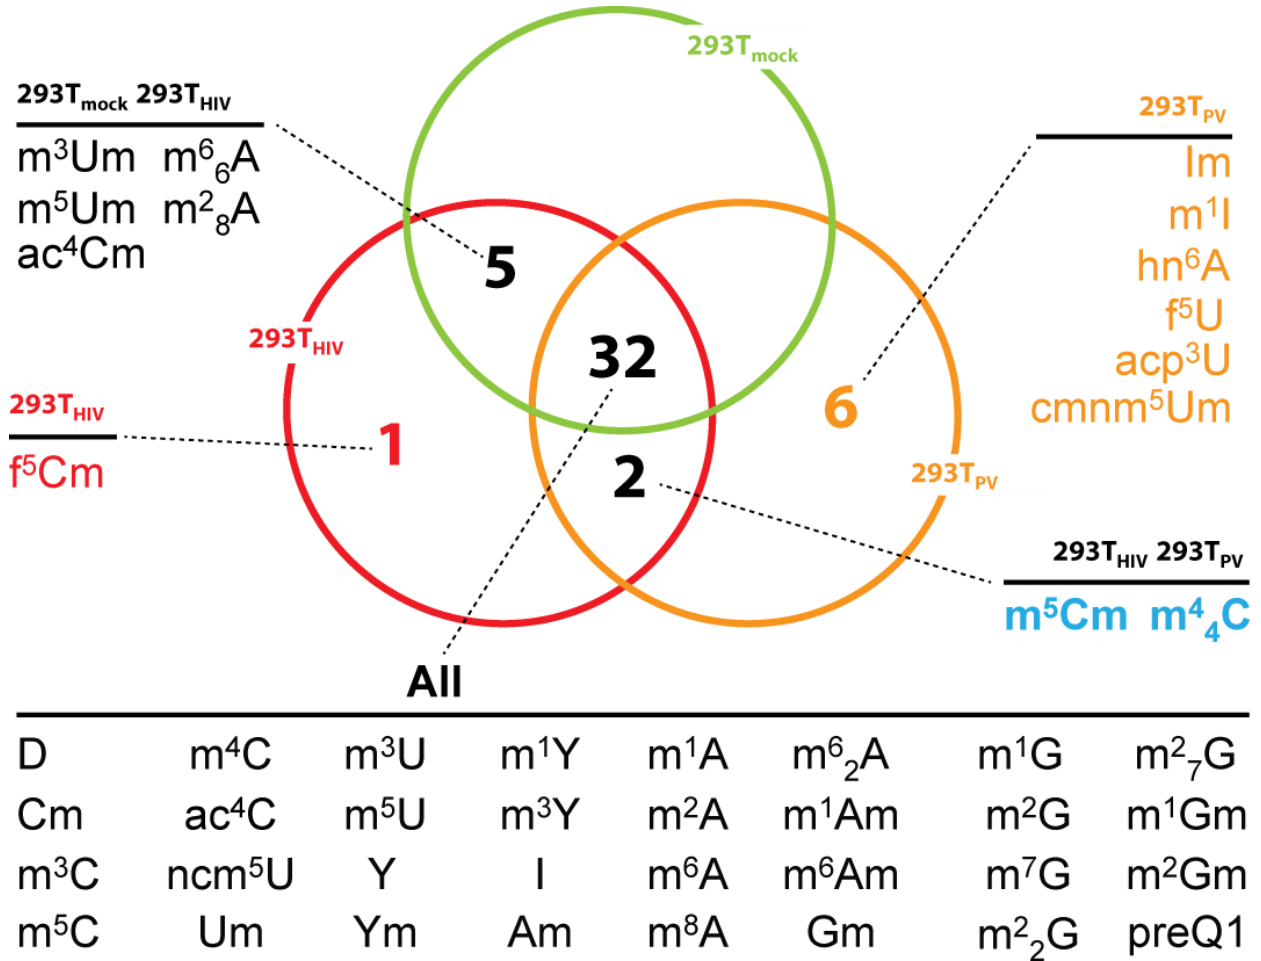

**Figure S5.** Venn diagram generated from the PTM profiles of total RNA extracts obtained from mock-, PV-, and HIV-infected 293T cells. These diagrams were based exclusively on the presence/absence of each PTM, while comprehensive data displaying abundance variations are reported separately in **Table S4** and **S6**. Full PTM names are listed in **Table S3**.

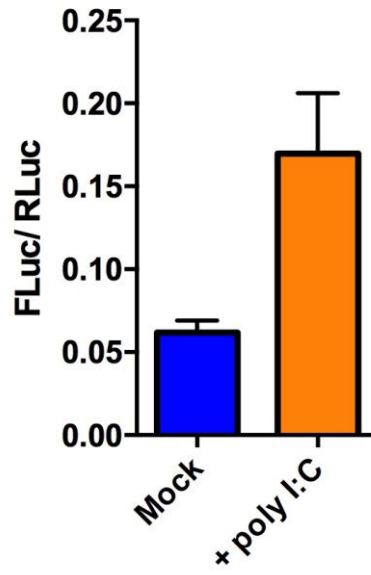

**Figure S6:** Representative luciferase assay measuring IFN- $\beta$  promoter activity by poly(I:C). Huh7 cells were co-transfected with pIFN- $\beta$ -Firefly luciferase and pTK-*Renilla* luciferase. Twenty-four hours later, cells were transfected with transfection reagent alone (mock) or with poly(I:C), and firefly and *Renilla* luciferase activity were measured 24 hours later.

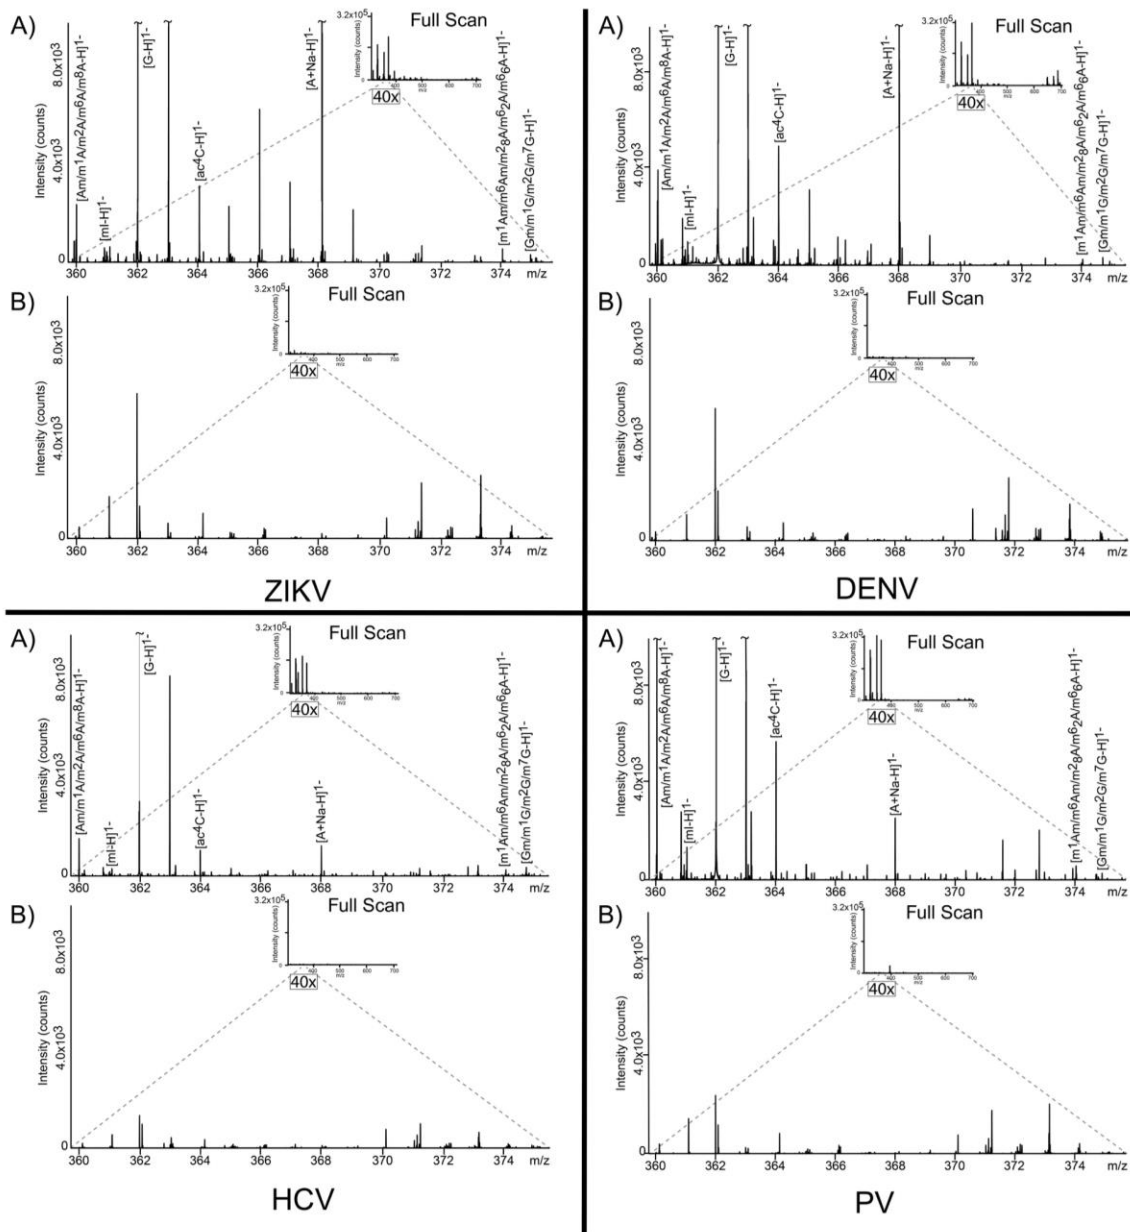

**Figure S7.** ESI-MS spectra obtained from exonuclease digests of viral RNA captured from **A)** virus- and **B)** mock-infected Huh7 cells, as described in **Material and Methods**. Signals corresponding to the four canonical bases (C, U, A, and G) and numerous PTMs are readily recognizable in panel **a)**, whereas no such species are present in panel **b)**, thus confirming the specificity of the capture process. Each quadrant shows the affinity purification using the ZIKV, DENV, HCV and PV biotinylated antisense oligonucleotides.

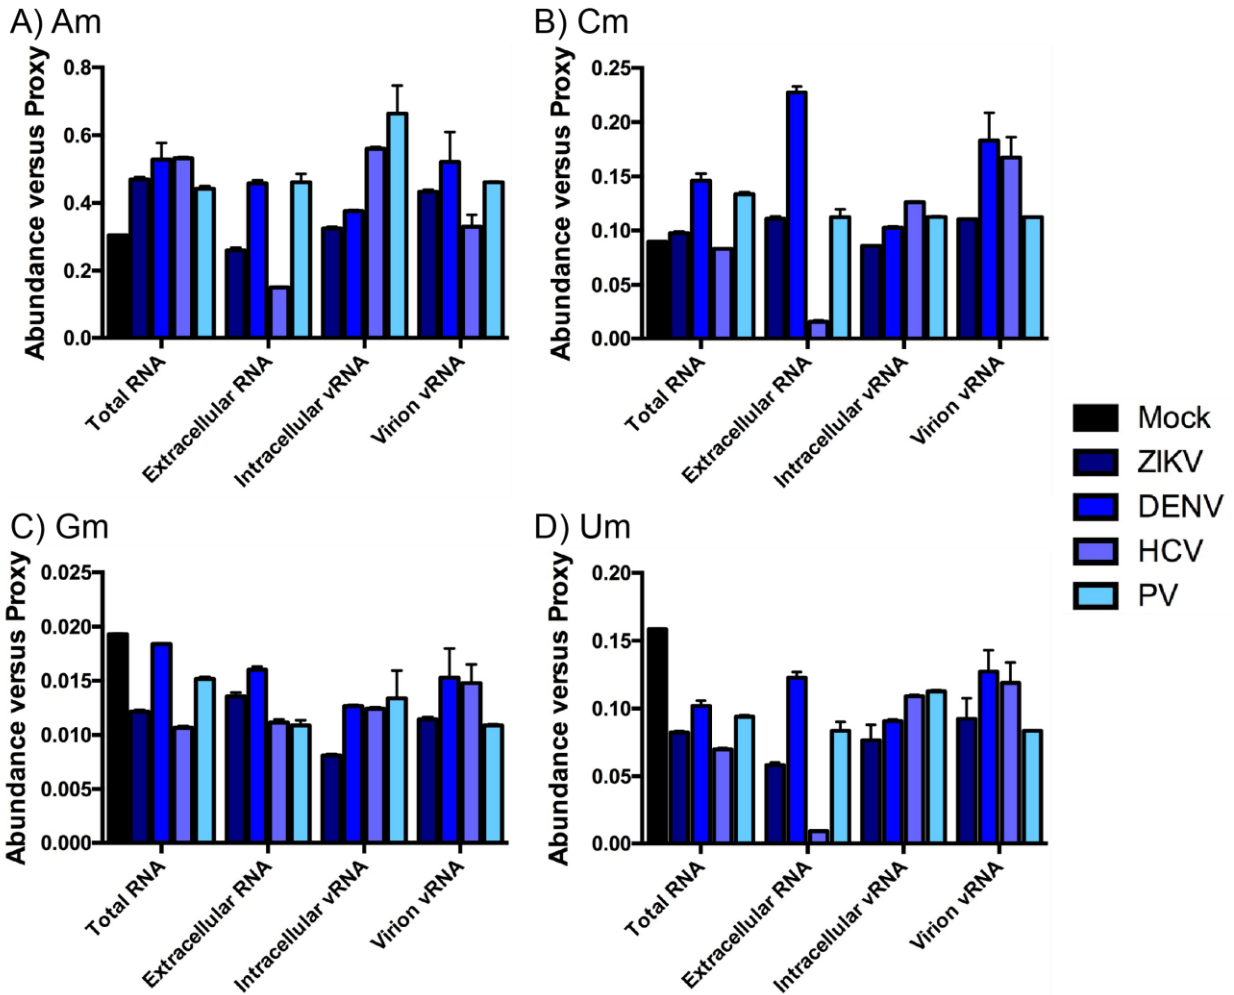

**Figure S8.** Variations of the relative abundance of 2' O-methylated ribonucleotides. Relative abundances were obtained from **A)** 2' O-methylated adenosine (Am), **B)** 2' O-methylated cytosine (Cm), **C)** 2' O-methylated guanosine (Gm), and **D)** 2' O-methylated uridine (Um), as described in *Materials and Methods*. The samples consisted of total RNA extracts from cell lysates (total RNA), media of mock- or virus-infected cells (extracellular RNA), and from viral RNA that were affinity captured from cell lysates (intracellular vRNA) or virions in the media (Virion vRNA).
